# Supplementary material for: Synthesis of methanesulfone-containing tetrasubstituted carbon stereocenters
Source: Royal Society of Chemistry journal article supplement (doi:10.1039/d1ob00071c), 2021-01-01

# Synthesis of methanesulfones-containing tetrasubstituted carbon stereocenters

Wei Zhou,<sup>a</sup> You-Ping Tian,<sup>b</sup> Hao-Jie Zhou,<sup>a</sup> Hui-Juan Wang,<sup>\*a</sup> Yan Ren<sup>a</sup> and Xiong-Li Liu<sup>\*a</sup>

<sup>a</sup> National & Local Joint Engineering Research Center for the Exploitation of Homology Resources of Southwest Medicine and Food, Guizhou University, Guiyang, Guizhou 550025, P. R. China.

<sup>b</sup> College of Pharmaceutical Sciences, Guizhou University of Chinese Medicine, Guiyang, Guizhou 550025, P. R. China.

E-mail: xlliul@gzu.edu.cn and xuchwhj@163.com

## Table of Contents

|                                                                                                                                     |    |
|-------------------------------------------------------------------------------------------------------------------------------------|----|
| Table of contents.....                                                                                                              | S1 |
| 1. General experimental information.....                                                                                            | S2 |
| 2. Procedure for the synthesis of compounds <b>1</b> .....                                                                          | S2 |
| 3. Typical experimental procedures for synthesis of compounds <b>3</b> .....                                                        | S2 |
| 4. Procedure for the synthesis of compounds <b>IB</b> .....                                                                         | S2 |
| 5. Gram scale synthesis of the product <b>3q</b> .....                                                                              | S3 |
| 6. Scheme S1: control experiments.....                                                                                              | S3 |
| 7. Scheme S2: control experiments.....                                                                                              | S4 |
| 8. Scheme S3: other substrates in this transformation.....                                                                          | S4 |
| 9. X-Ray Crystal Data for Compound <b>3a</b> .....                                                                                  | S5 |
| 10. The copies of <sup>1</sup> H NMR, <sup>13</sup> C NMR and <sup>19</sup> F NMR spectra for compounds <b>1</b> and <b>3</b> ..... | S6 |



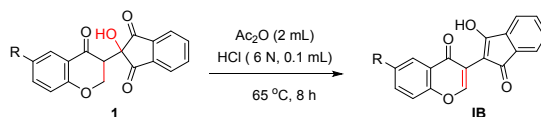

A solution of substrate **1** (0.20 mmol) in Ac<sub>2</sub>O (2.0 mL) was added HCl (6 N, 0.1 mL), and then stirred at 65 °C for 8 h. After completion of the reaction, as indicated by TLC, the removal of solvent and purification by flash column chromatography (hexane/EtOAc = 5:1~3:1) was carried out to furnish the indanedione-chromanone synthon **1B** as a red solid.

### 5. Gram scale synthesis of the product **3q**

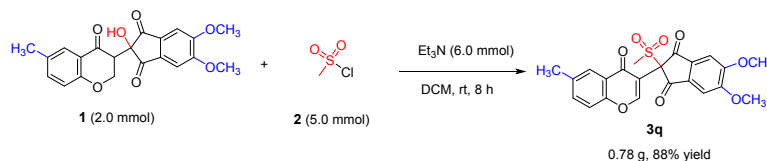

Compound **1** (2.0 mmol) and Et<sub>3</sub>N (6.0 mmol) were dissolved in DCM (15 mL). MsCl (5.0 mmol) was added to this solution at room temperature, and the mixture was stirred for 8 h. After the removal of solvent, purification by flash column chromatography (hexane/ethyl acetate = 8:1~5:1) was carried out to give product **3q** as a light yellow solid (0.78 g, 88% yield).

### 6. Scheme S1: control experiments

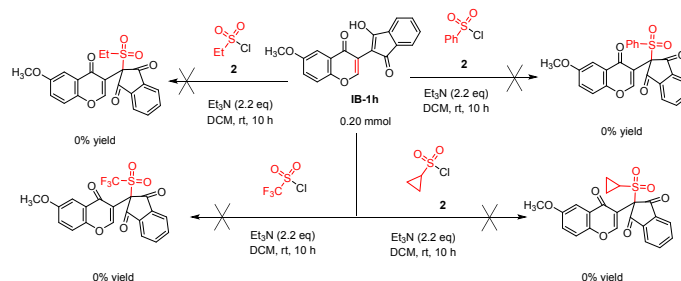

Compound **1B-1h** (0.20 mmol) and Et<sub>3</sub>N (0.44 mmol) was dissolved in DCM (1.5 mL). compound **2** (0.40 mmol) was added to this solution at room temperature, and the mixture was stirred for 10 h, however, the expected corresponding sulfone **3** was not observed with intractable product mixtures (0% yield).

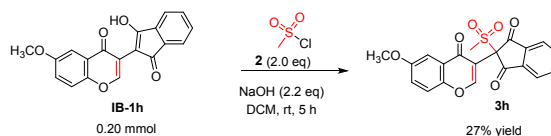

Compound **1B-1h** (0.20 mmol) and NaOH (0.44 mmol) was dissolved in DCM (1.5 mL). compound **2** (0.40 mmol) was added to this solution at room temperature, and the mixture was

stirred for 5 h. After the removal of solvent, purification by flash column chromatography (hexane/ethyl acetate = 8:1~5:1) was carried out to give product **3h** as a light yellow solid (27% yield).

## 7. Scheme S2: control experiments

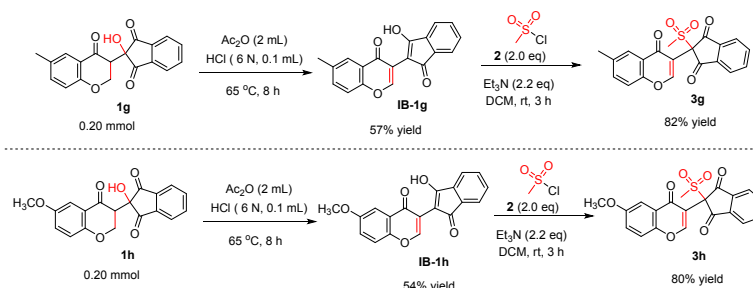

Compound **1** (0.20 mmol) was dissolved in Ac<sub>2</sub>O (2 mL). HCl (6 N, 0.1 mL) was added to this solution at 65 °C, and the mixture was stirred for 8 h. After the removal of solvent, purification by flash column chromatography (hexane/ethyl acetate = 8:1~5:1) was carried out to give intermediate **IB** as a red solid.

Intermediate **IB** (0.2 mmol) and Et<sub>3</sub>N (4.4 mmol) were dissolved in DCM (1.5 mL). MsCl (0.40 mmol) was added to this solution at room temperature, and the mixture was stirred for 3 h. After the removal of solvent, purification by flash column chromatography (hexane/ethyl acetate = 6:1~4:1) was carried out to give product **3** as a light yellow solid.

## 8. Scheme S3: other substrates in this transformation

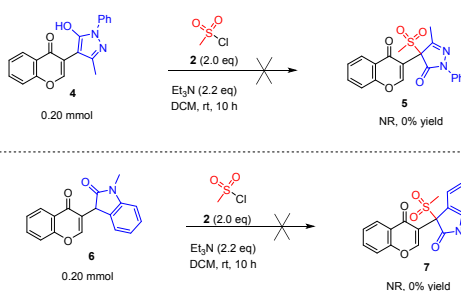

Compound **4** or **6** (0.20 mmol) and Et<sub>3</sub>N (0.44 mmol) was dissolved in DCM (1.5 mL). compound **2** (0.40 mmol) was added to this solution at room temperature, and the mixture was stirred for 10 h, however, the expected corresponding sulfone **5** or **7** was not observed with recovery of starting material **4** or **6** (0% yield).

## 9. X-Ray Crystal Data for Compound 3a

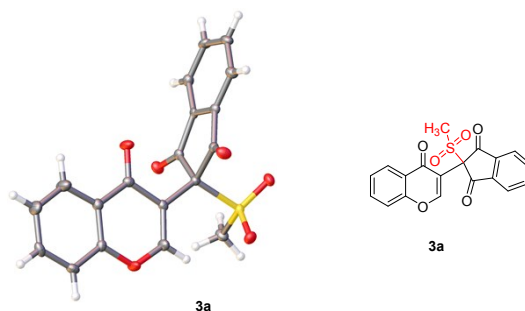

**Table S1 Crystal data and structure refinement for 3a**

|                                             |                                                               |
|---------------------------------------------|---------------------------------------------------------------|
| Identification code                         | <b>3a</b>                                                     |
| Empirical formula                           | C <sub>19</sub> H <sub>12</sub> O <sub>6</sub> S              |
| Formula weight                              | 368.35                                                        |
| Temperature/K                               | 100.00(10)                                                    |
| Crystal system                              | triclinic                                                     |
| Space group                                 | P-1                                                           |
| a/Å, b/Å, c/Å                               | 7.6249(5), 9.1227(5), 12.8047(9)                              |
| α/°, β/°, γ/°                               | 85.841(5), 88.200(5), 81.018(5).                              |
| Volume/Å <sup>3</sup>                       | 877.27(10)                                                    |
| Z                                           | 2                                                             |
| ρ <sub>calc</sub> /cm <sup>3</sup>          | 1.394                                                         |
| μ/mm <sup>-1</sup>                          | 0.217                                                         |
| F(000)                                      | 380.0                                                         |
| Radiation                                   | Mo Kα (λ = 0.71073)                                           |
| Crystal size/mm <sup>3</sup>                | 0.14 × 0.13 × 0.12                                            |
| 2θ range for data collection/°              | 4.532 to 49.994                                               |
| Index ranges                                | -9 ≤ h ≤ 9, -10 ≤ k ≤ 10, -12 ≤ l ≤ 15                        |
| Reflections collected                       | 5655                                                          |
| Independent reflections                     | 3074 [R <sub>int</sub> = 0.0247, R <sub>sigma</sub> = 0.0446] |
| Data/restraints/parameters                  | 3074/0/236                                                    |
| Goodness-of-fit on F <sup>2</sup>           | 1.097                                                         |
| Final R indexes [I >= 2σ (I)]               | R <sub>1</sub> = 0.0470, wR <sub>2</sub> = 0.1165             |
| Final R indexes [all data]                  | R <sub>1</sub> = 0.0532, wR <sub>2</sub> = 0.1205             |
| Largest diff. peak/hole / e Å <sup>-3</sup> | 0.41/-0.49                                                    |

Crystal data for **3a**: (*M* = 368.35 g/mol): triclinic, space group P-1 (no. 2), *a* = 7.6249(5) Å, *b* = 9.1227(5) Å, *c* = 12.8047(9) Å, α = 85.841(5)°, β = 88.200(5)°, γ = 81.018(5)°, *V* = 877.27(10) Å<sup>3</sup>, *Z* = 2, *T* = 100.00(10) K, μ(Mo Kα) = 0.217 mm<sup>-1</sup>, *D*<sub>calc</sub> = 1.394 g/cm<sup>3</sup>, 5655 reflections measured (4.532° ≤ 2θ ≤ 49.994°), 3074 unique (*R*<sub>int</sub> = 0.0247, *R*<sub>sigma</sub> = 0.0446) which were used in all calculations. The final *R*<sub>1</sub> was 0.0470 (*I* > 2σ(*I*)) and *wR*<sub>2</sub> was 0.1205 (all data).

### 10. The Copies of $^1\text{H}$ NMR, $^{13}\text{C}$ NMR and $^{19}\text{F}$ NMR Spectra for Compounds 1 and 3

#### $^1\text{H}$ and $^{13}\text{C}$ NMR of 1a

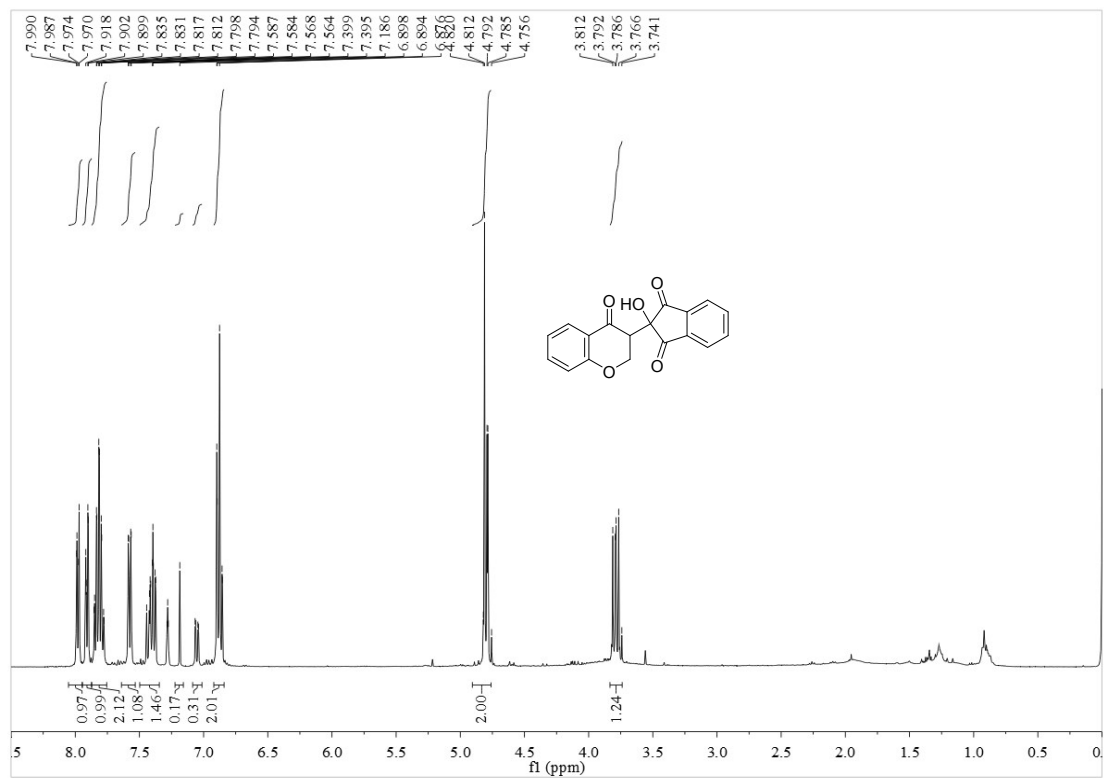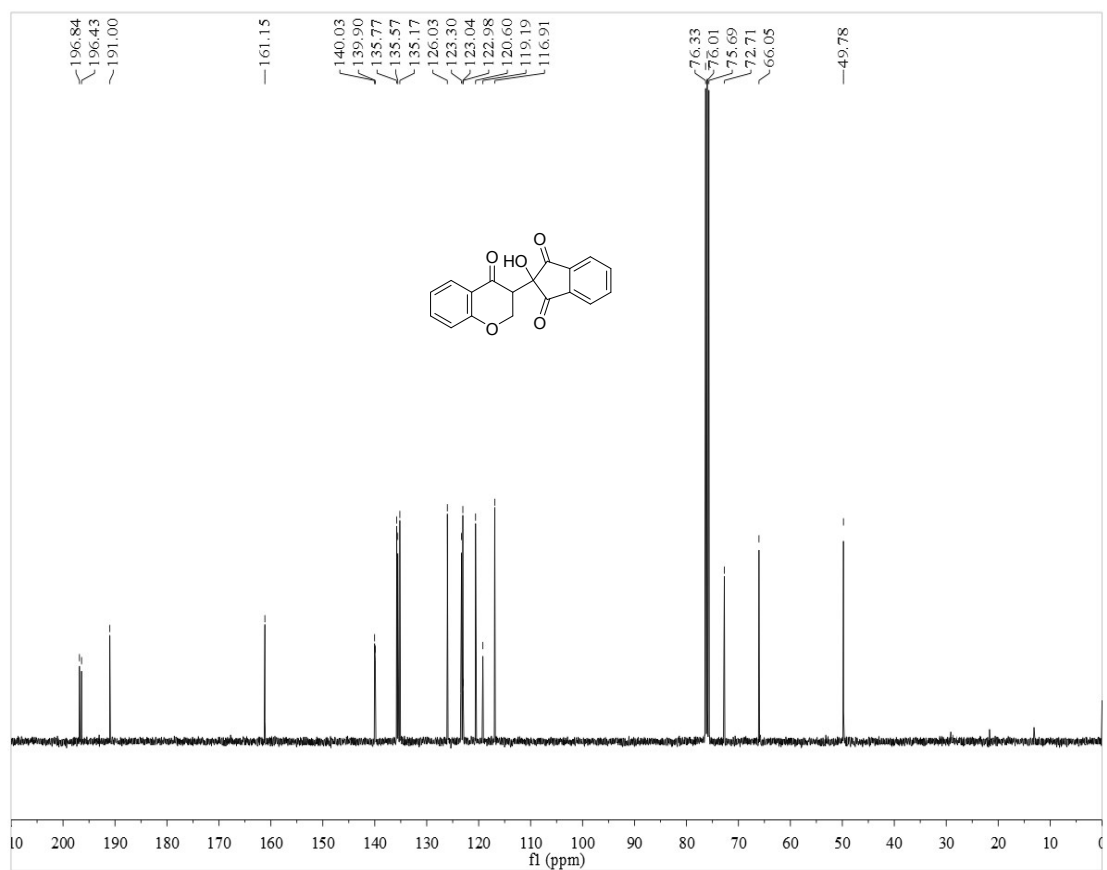

# <sup>1</sup>H and <sup>13</sup>C NMR of 1b

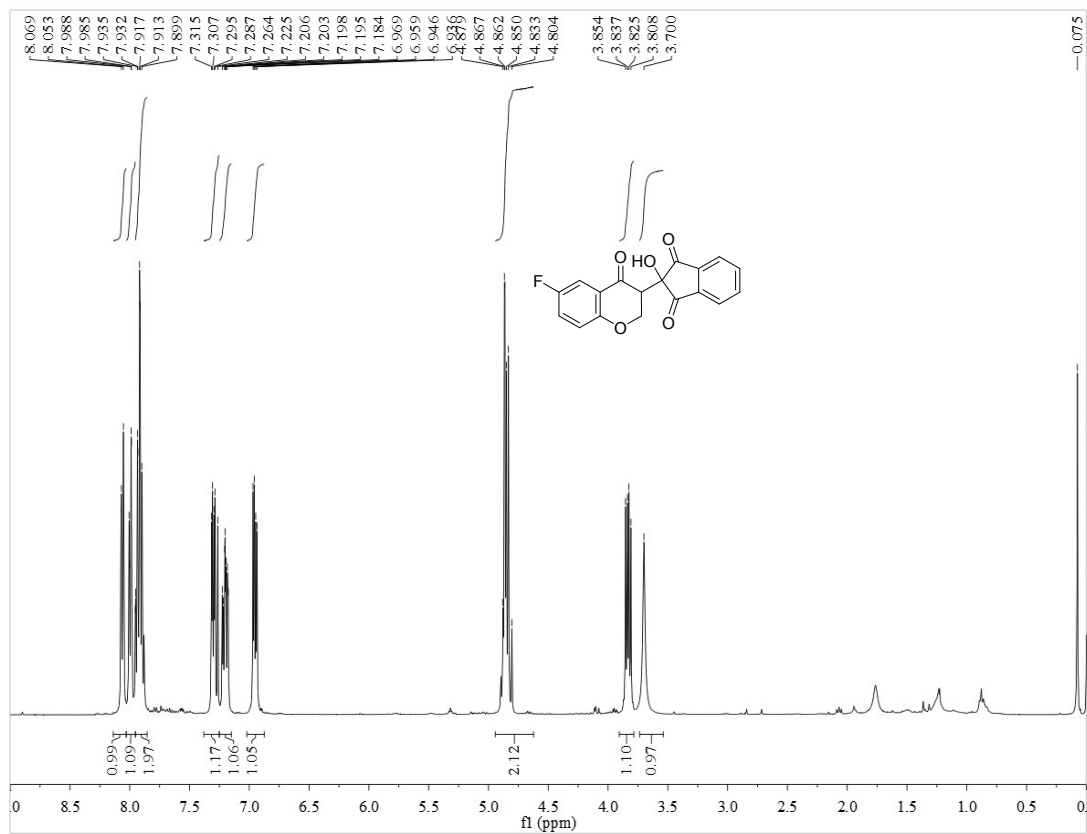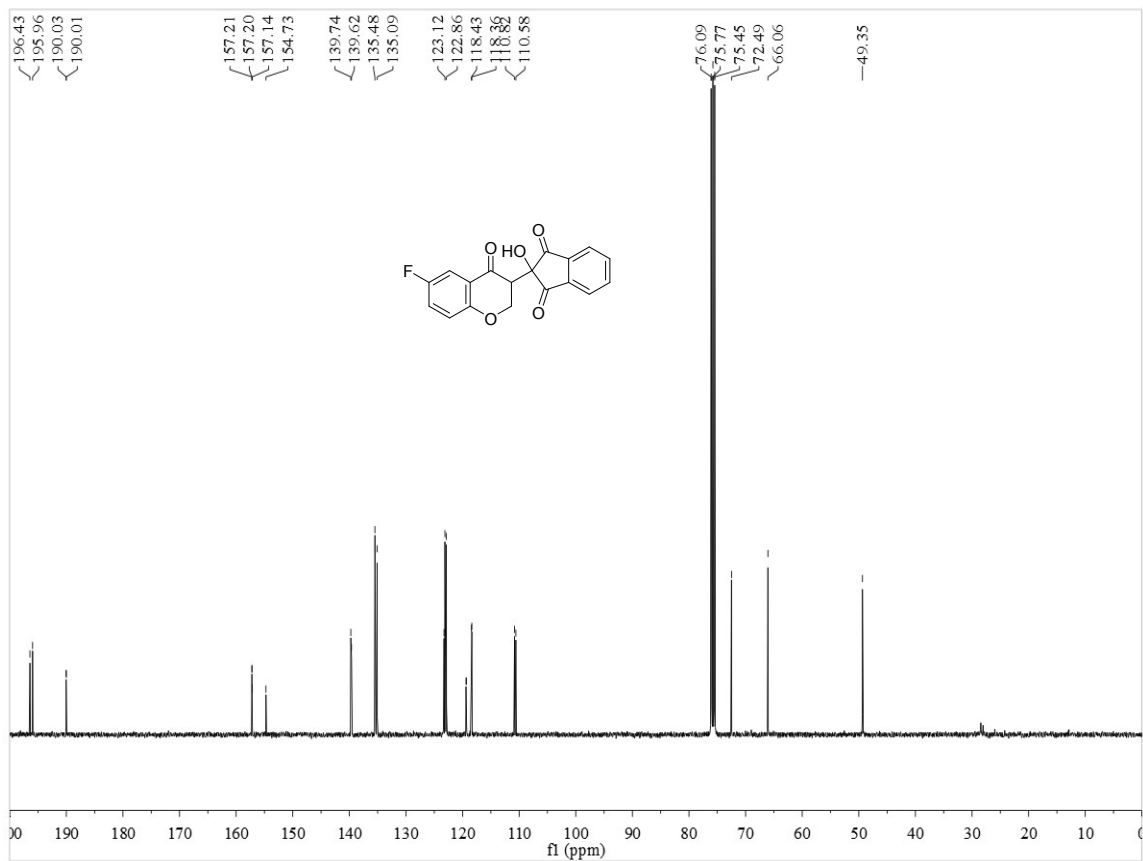

# <sup>19</sup>F NMR of 1b

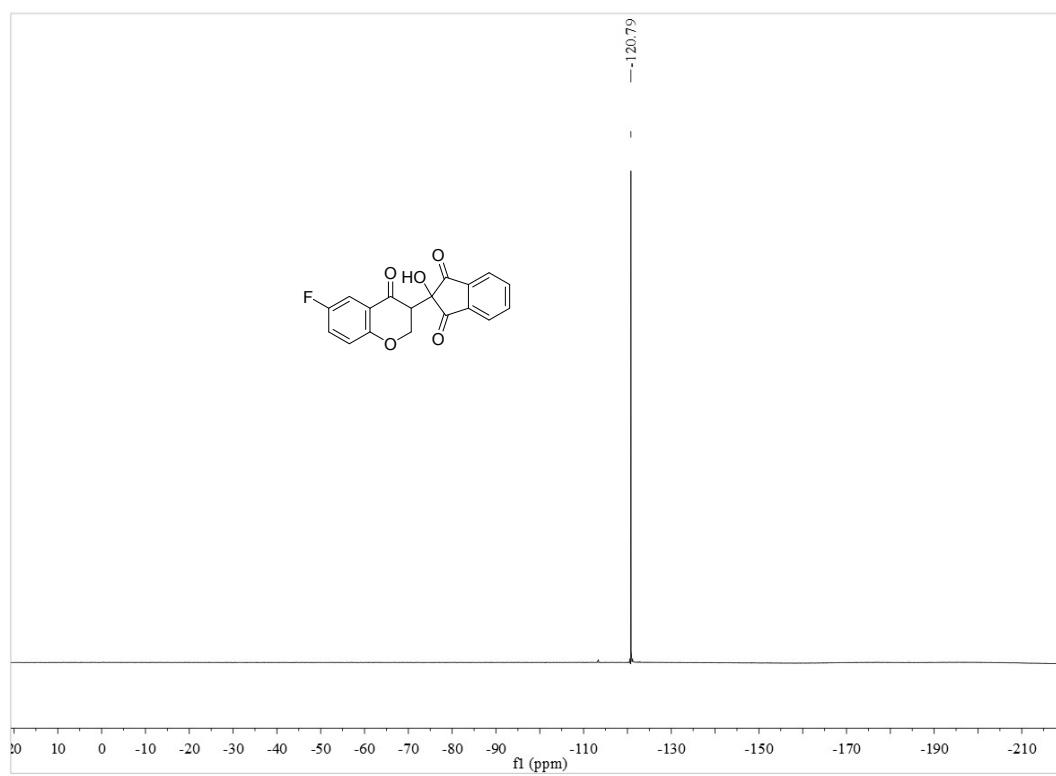



# $^1\text{H}$ and $^{13}\text{C}$ NMR of 1c

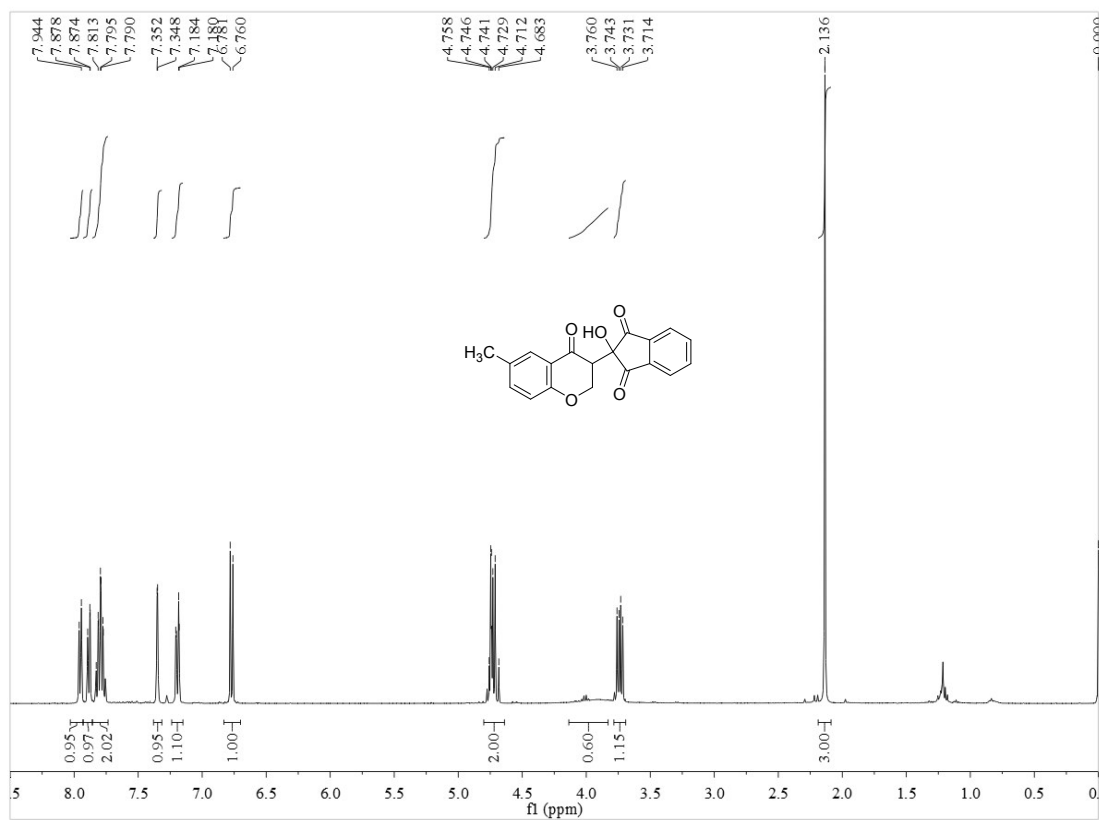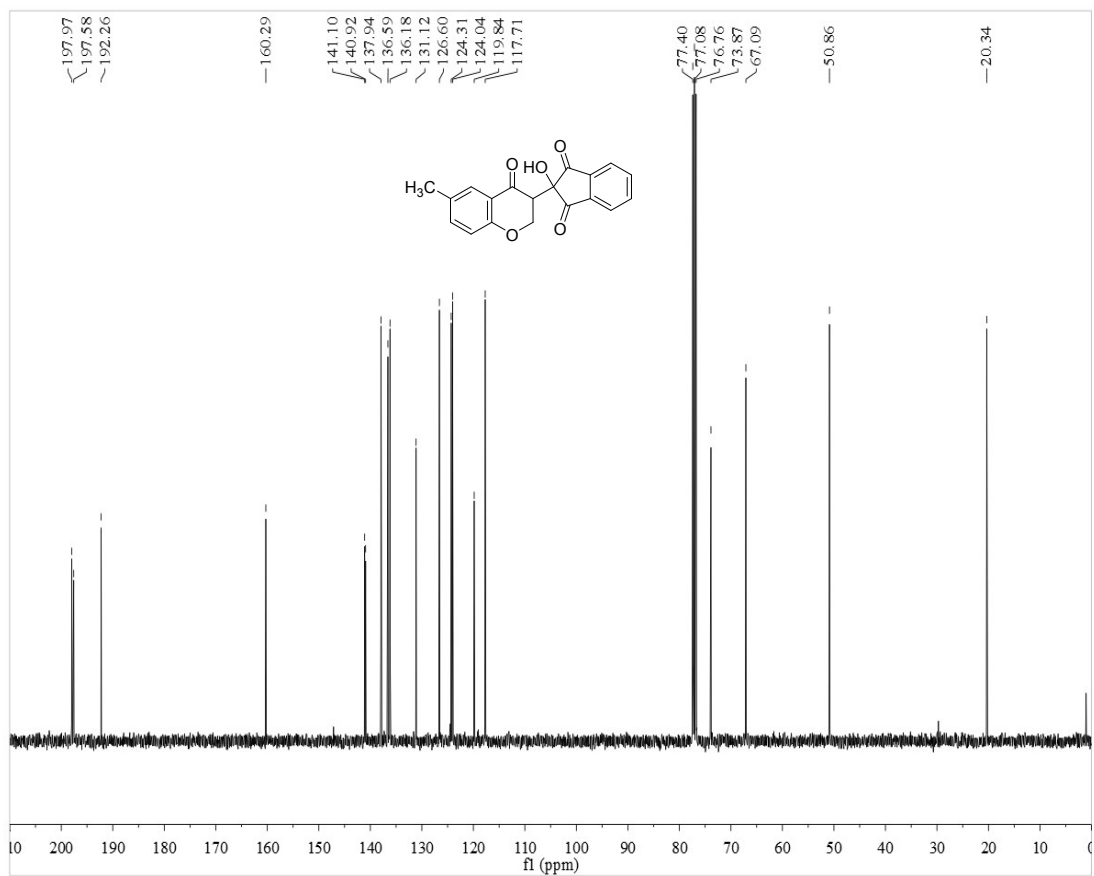

# <sup>1</sup>H and <sup>13</sup>C NMR of 1d

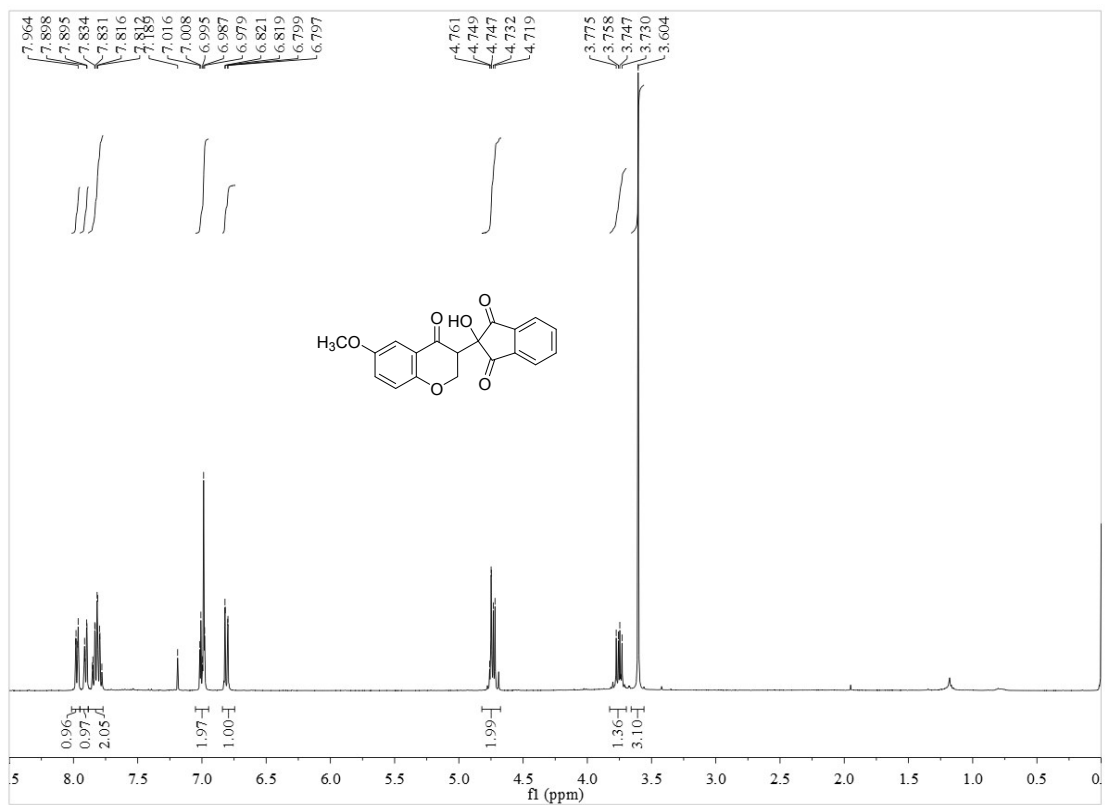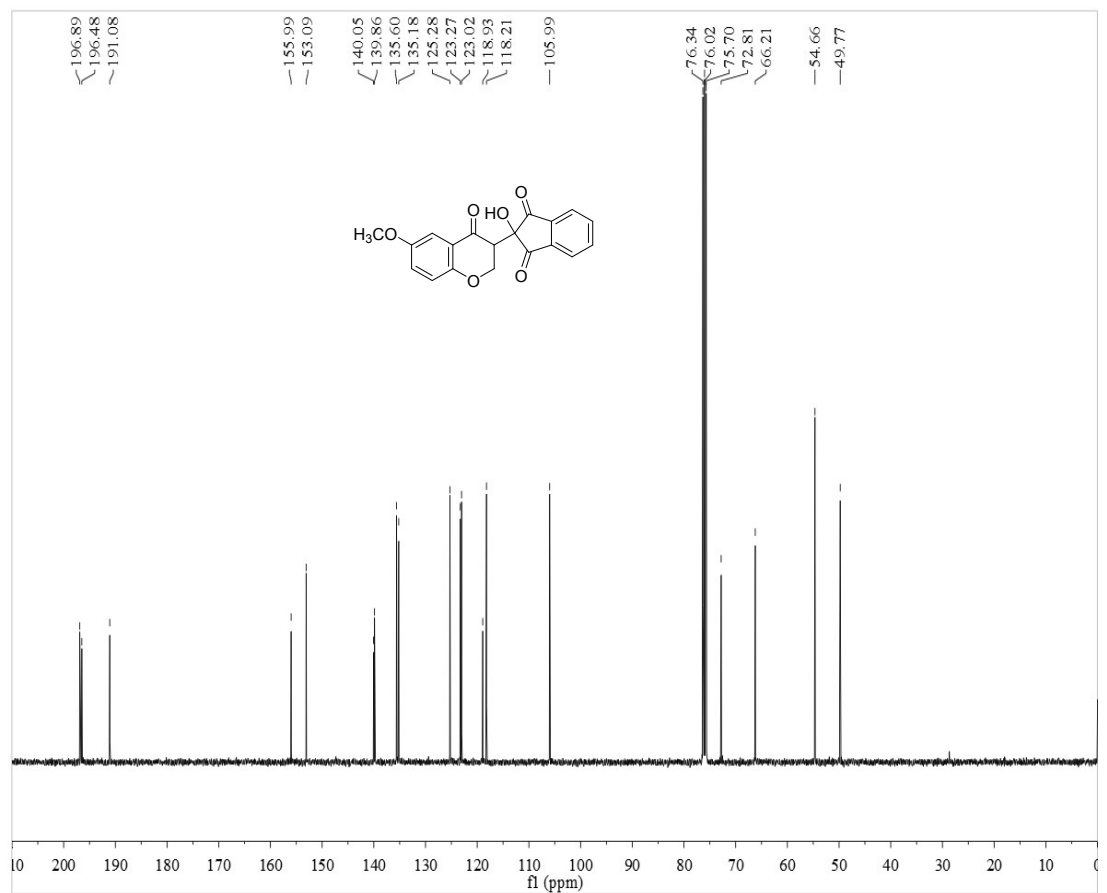

# <sup>1</sup>H and <sup>13</sup>C NMR of 1B-1g

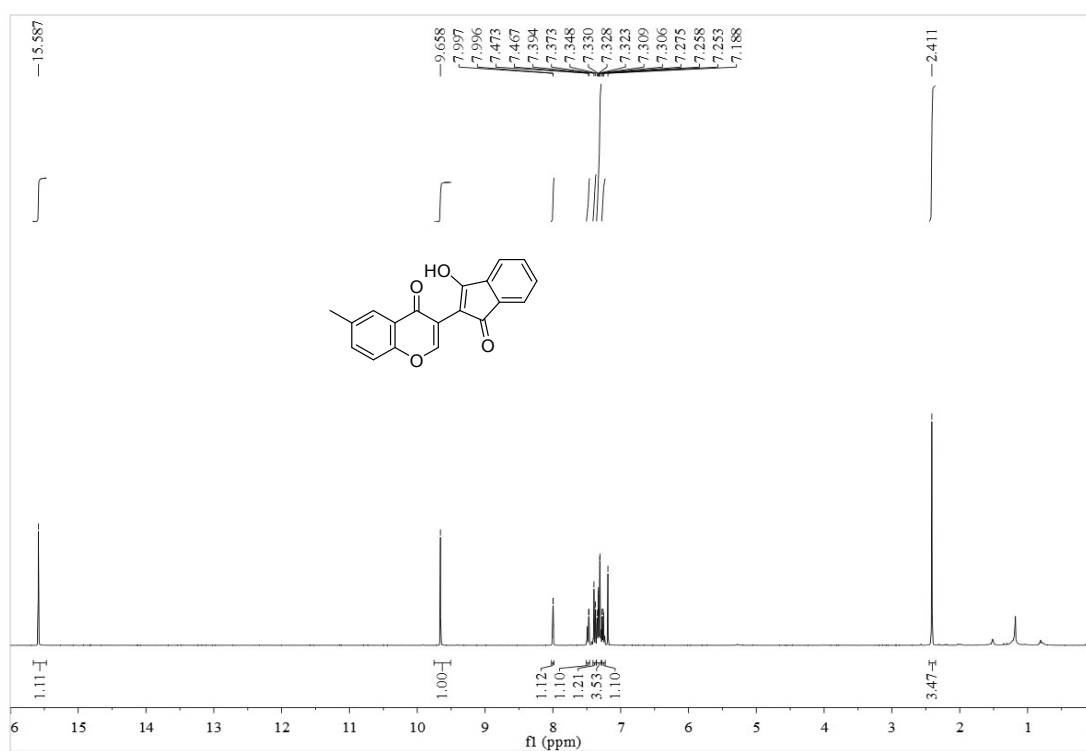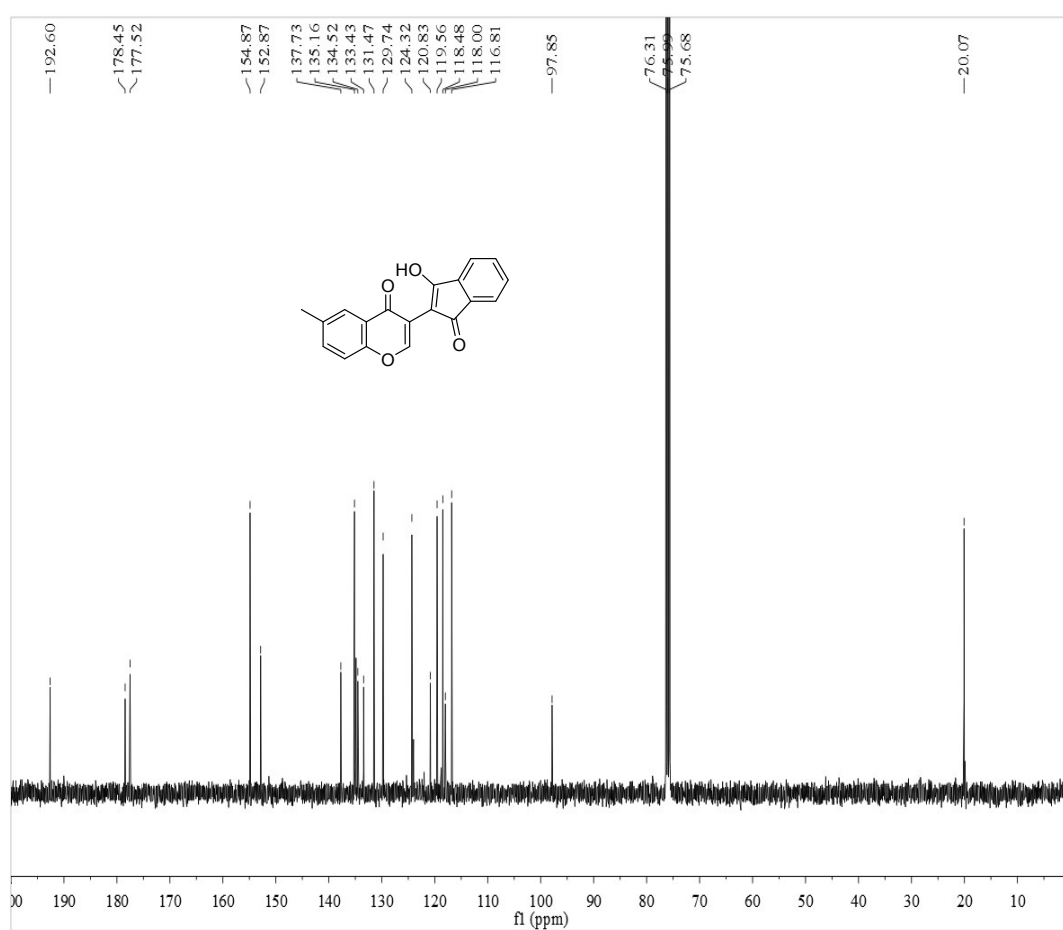

# <sup>1</sup>H and <sup>13</sup>C NMR of 1B-1h

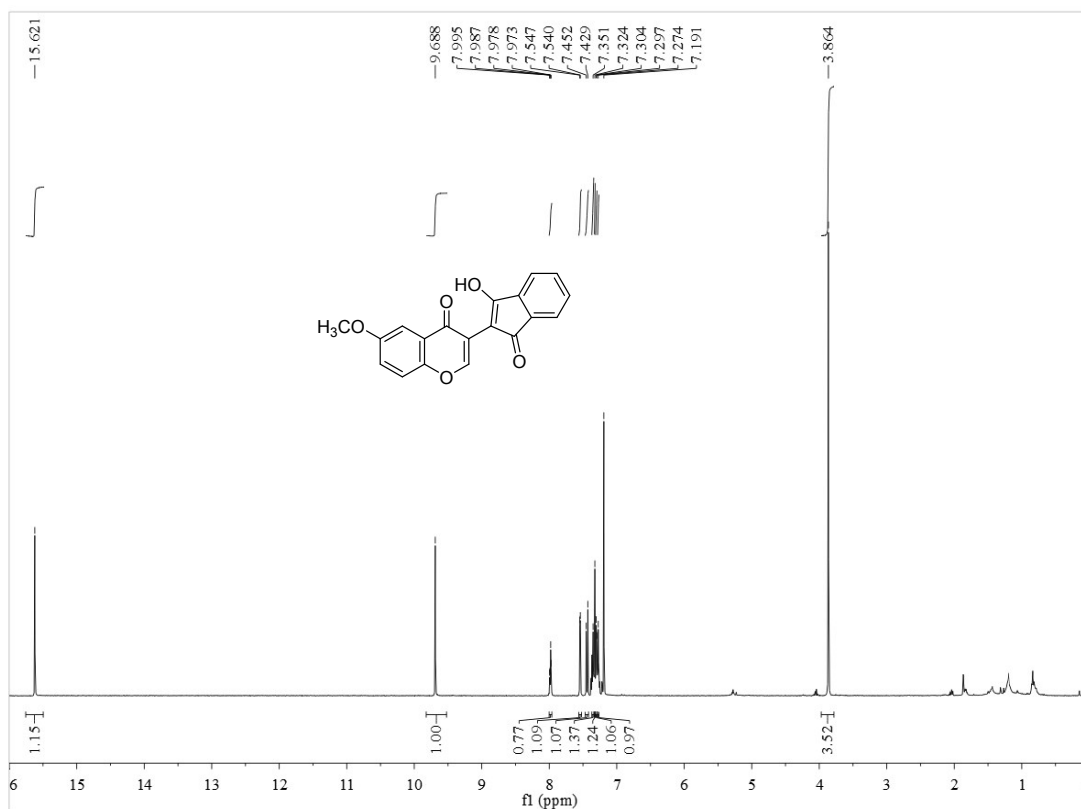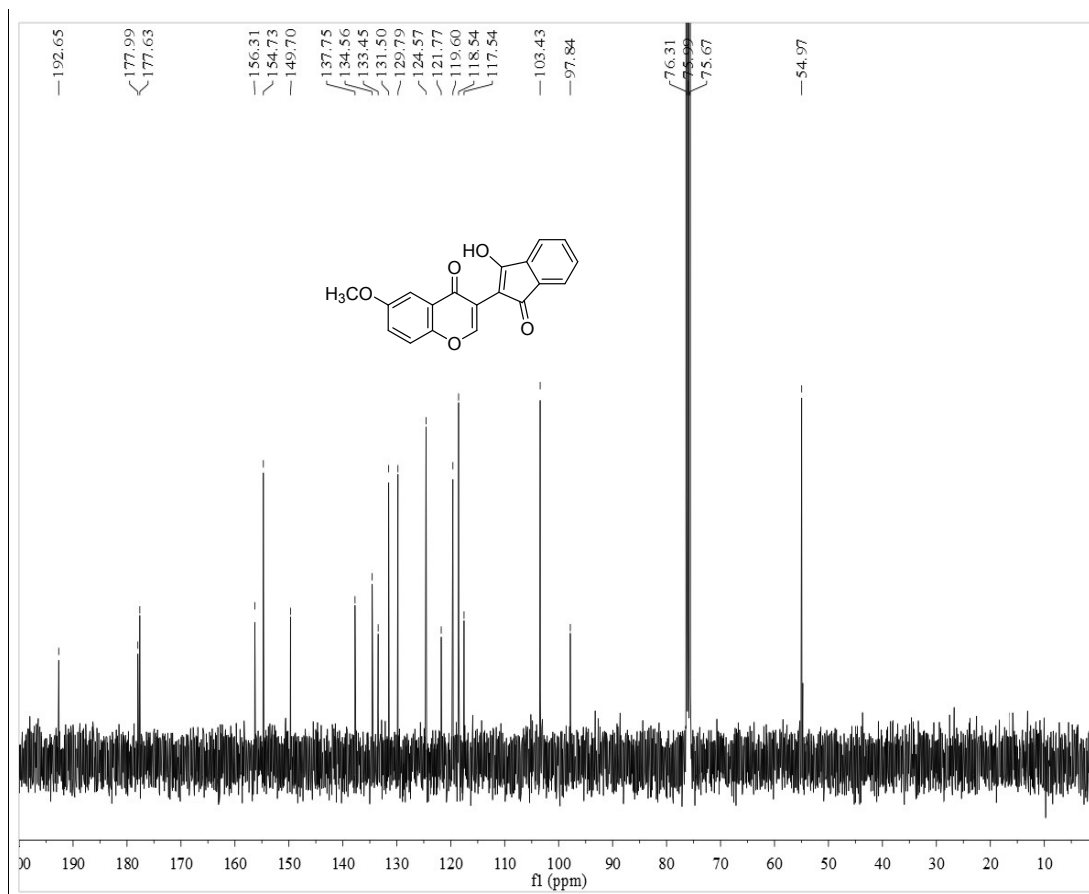

# <sup>1</sup>H and <sup>13</sup>C NMR of 3a

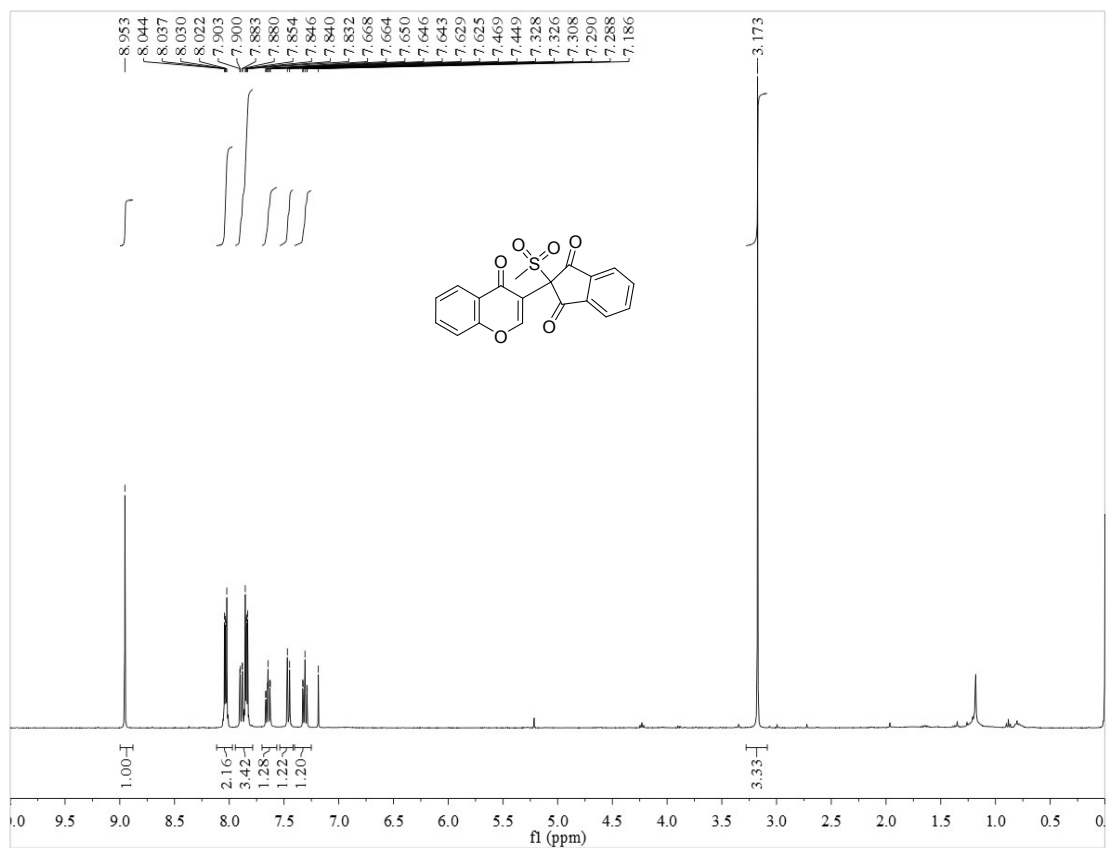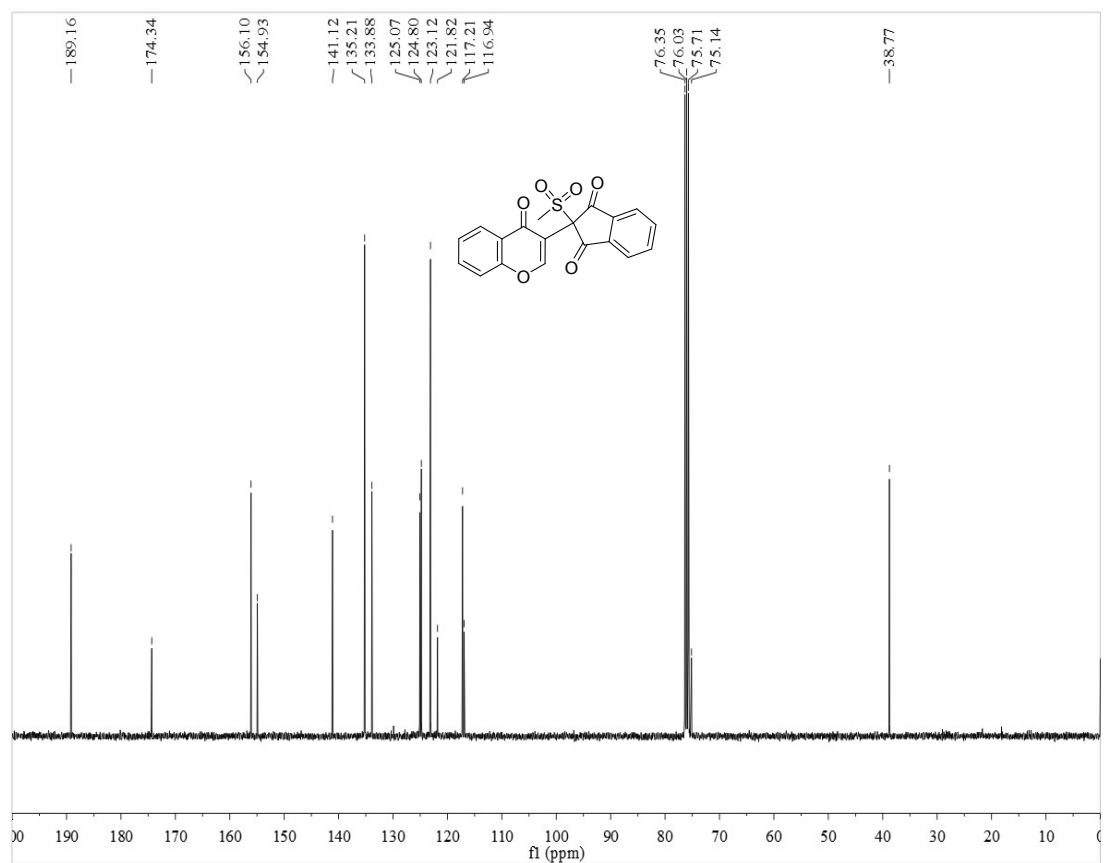

# <sup>1</sup>H and <sup>13</sup>C NMR of 3b

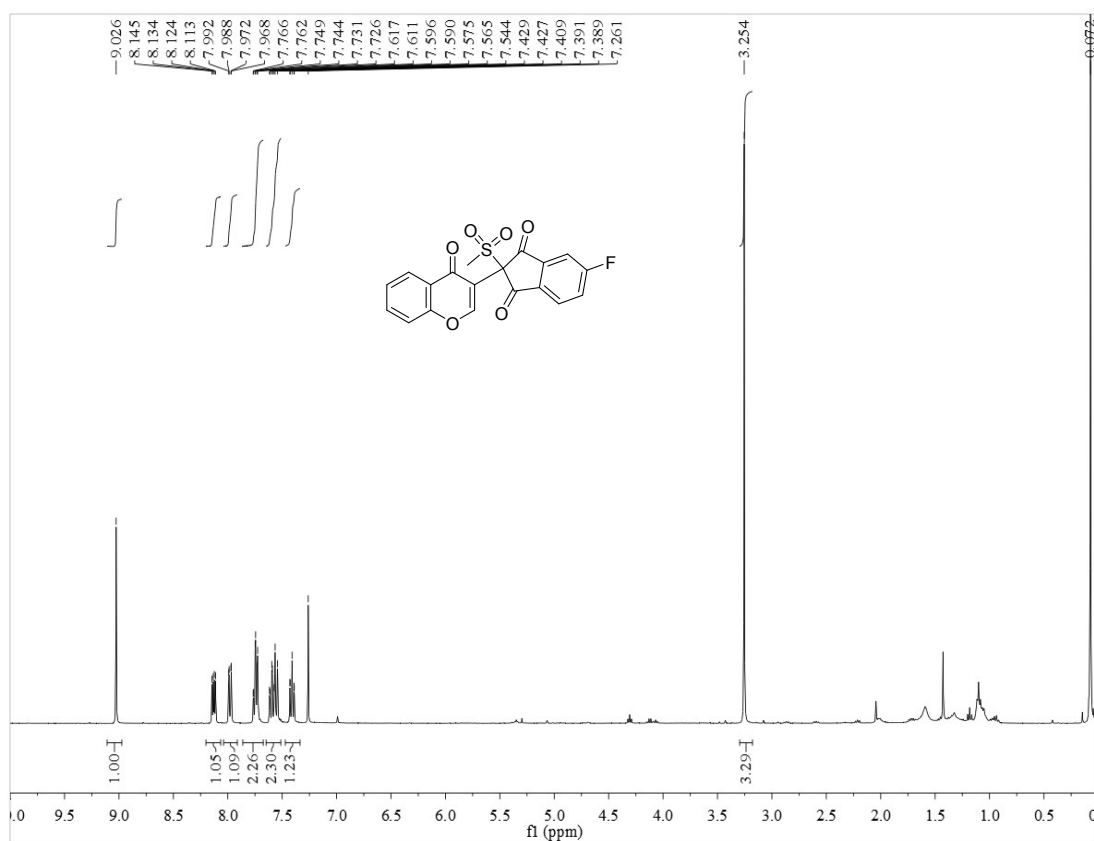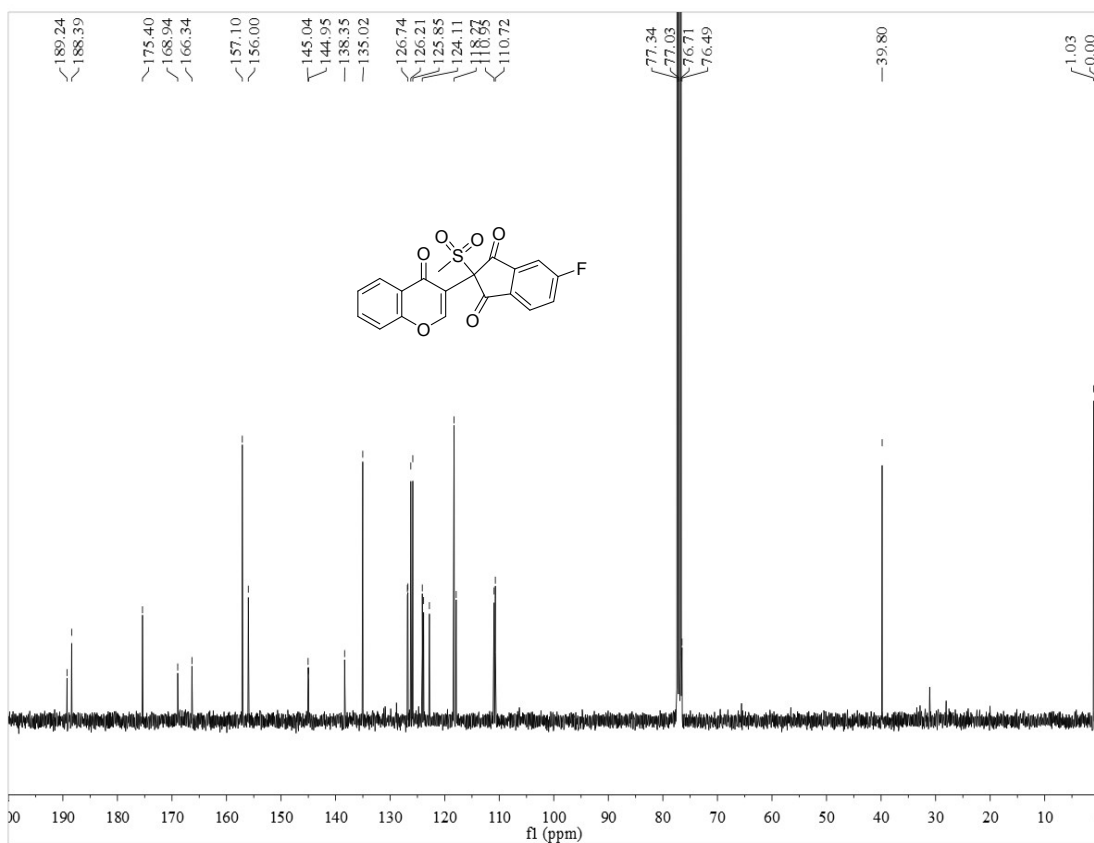

### <sup>19</sup>F NMR of 3b

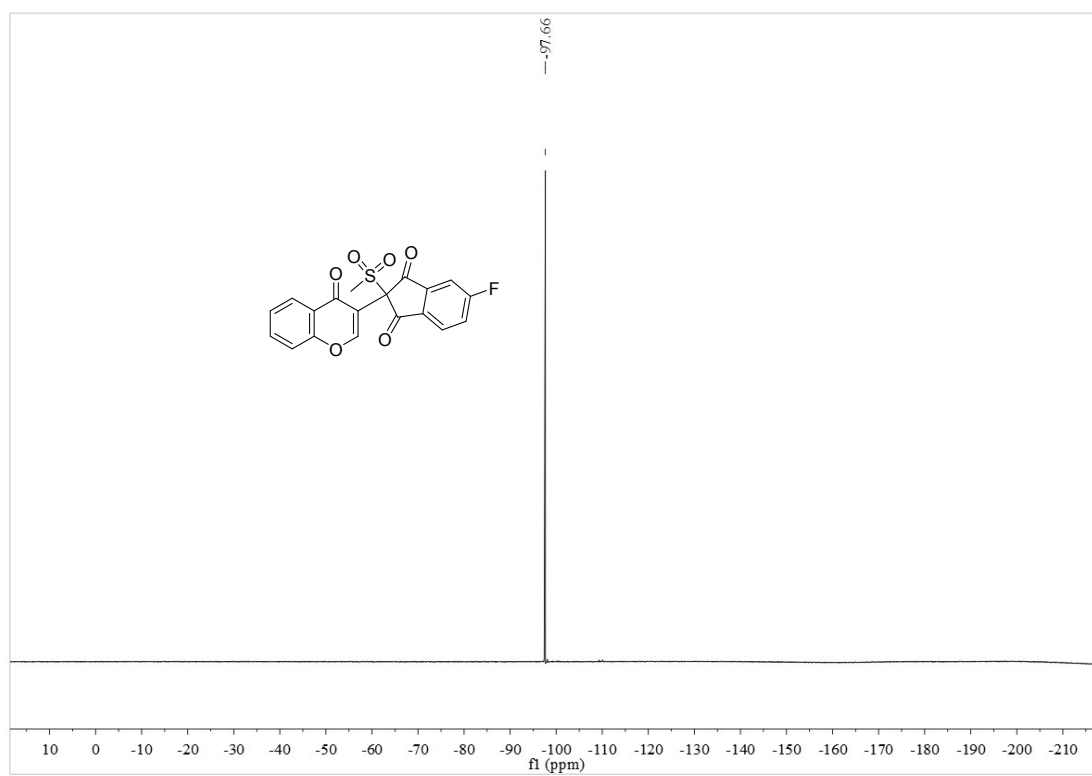

# <sup>1</sup>H and <sup>13</sup>C NMR of 3c

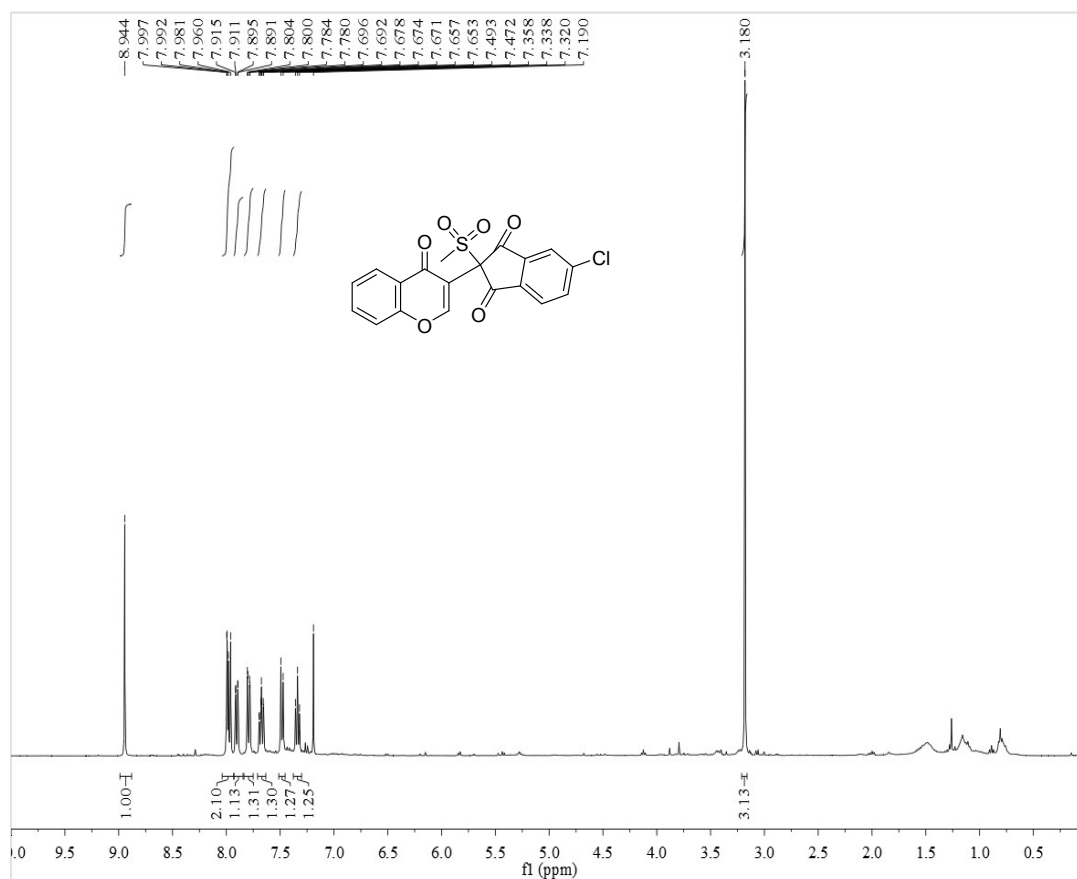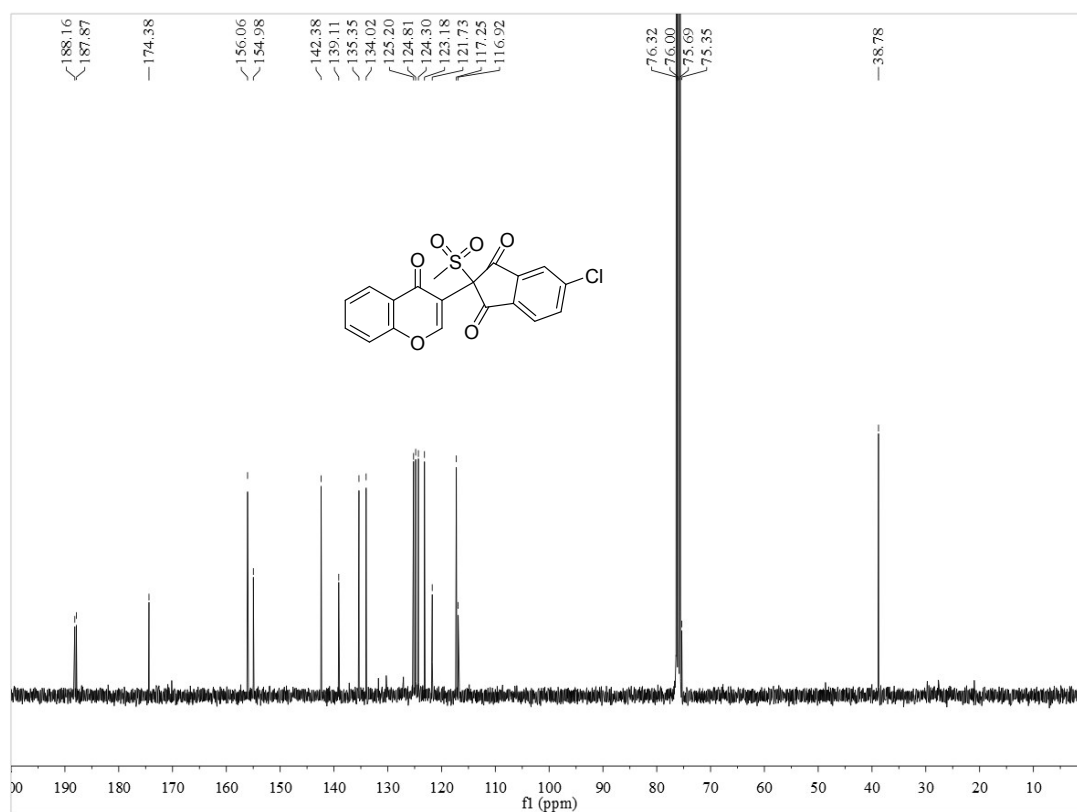



# <sup>1</sup>H and <sup>13</sup>C NMR of 3d

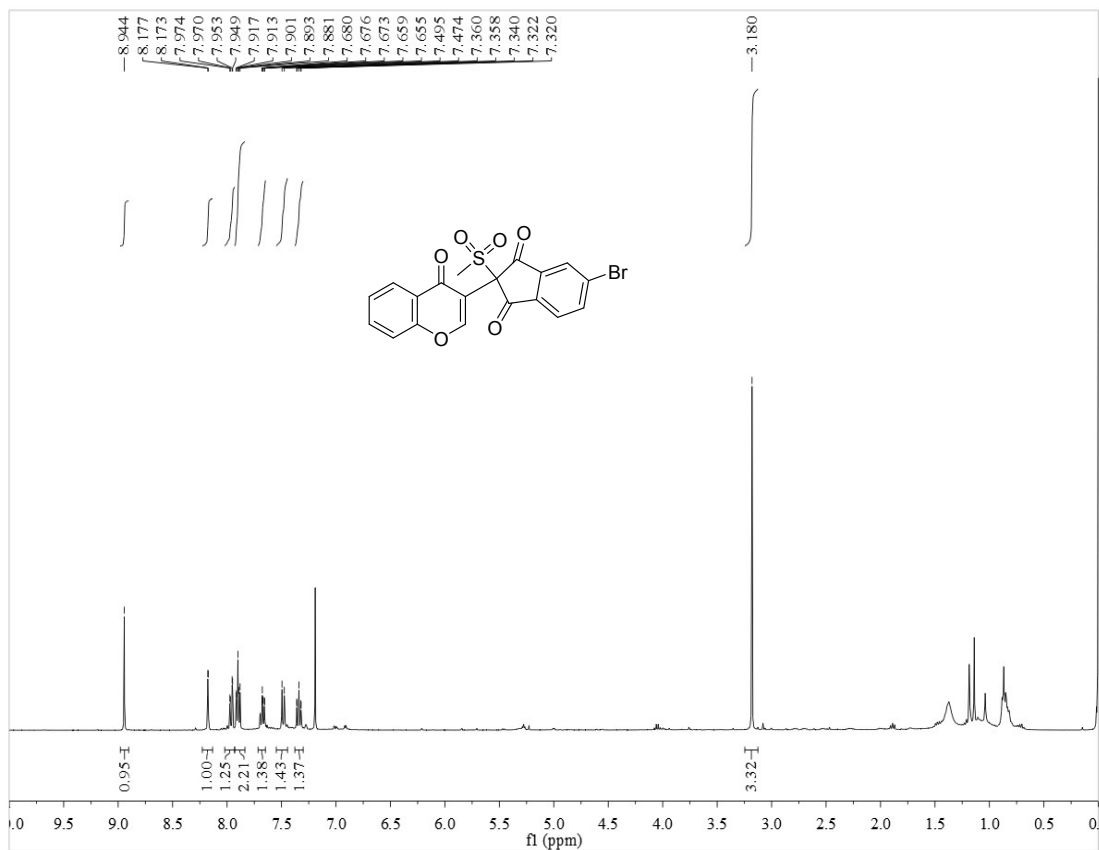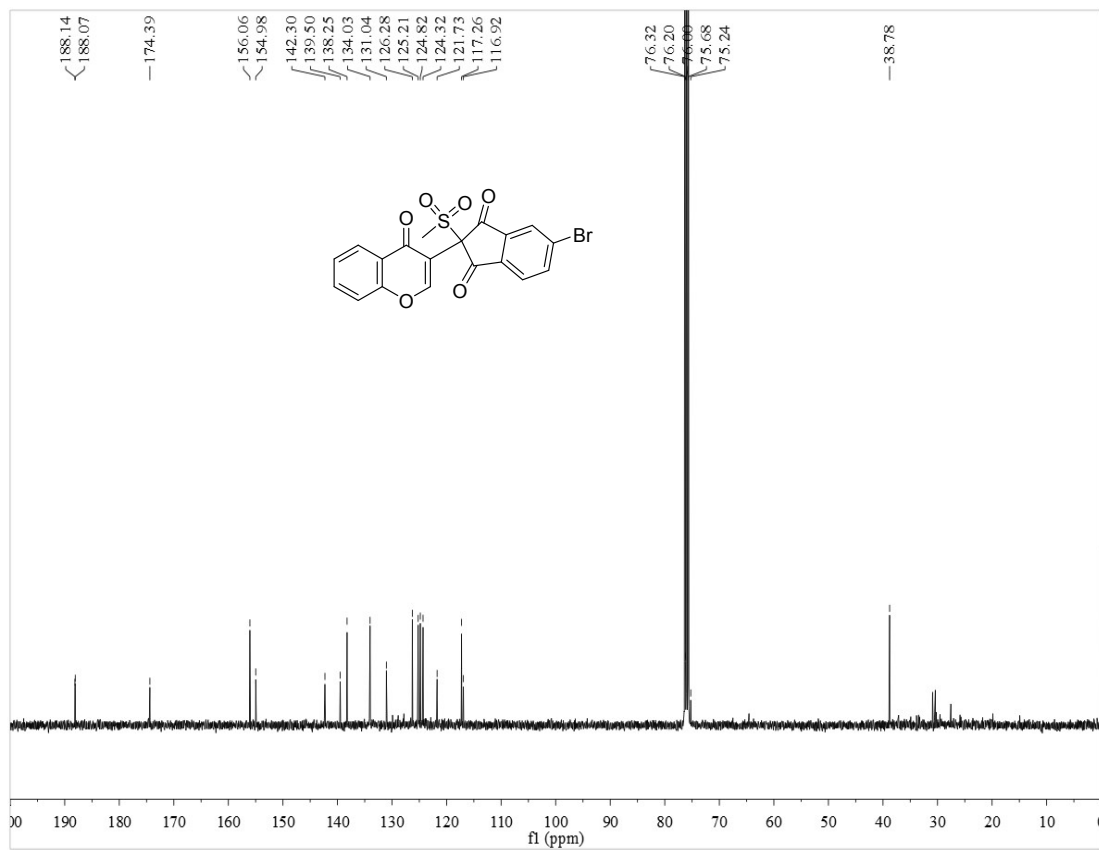

# <sup>1</sup>H and <sup>13</sup>C NMR of 3e

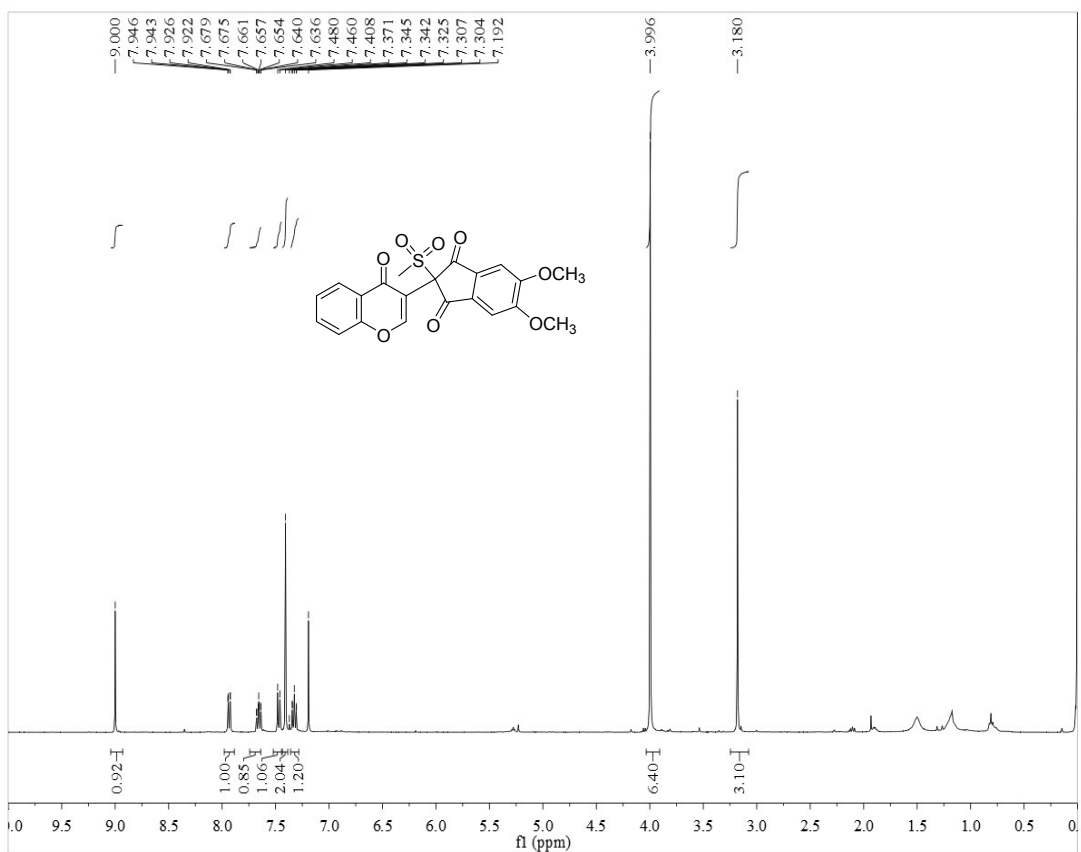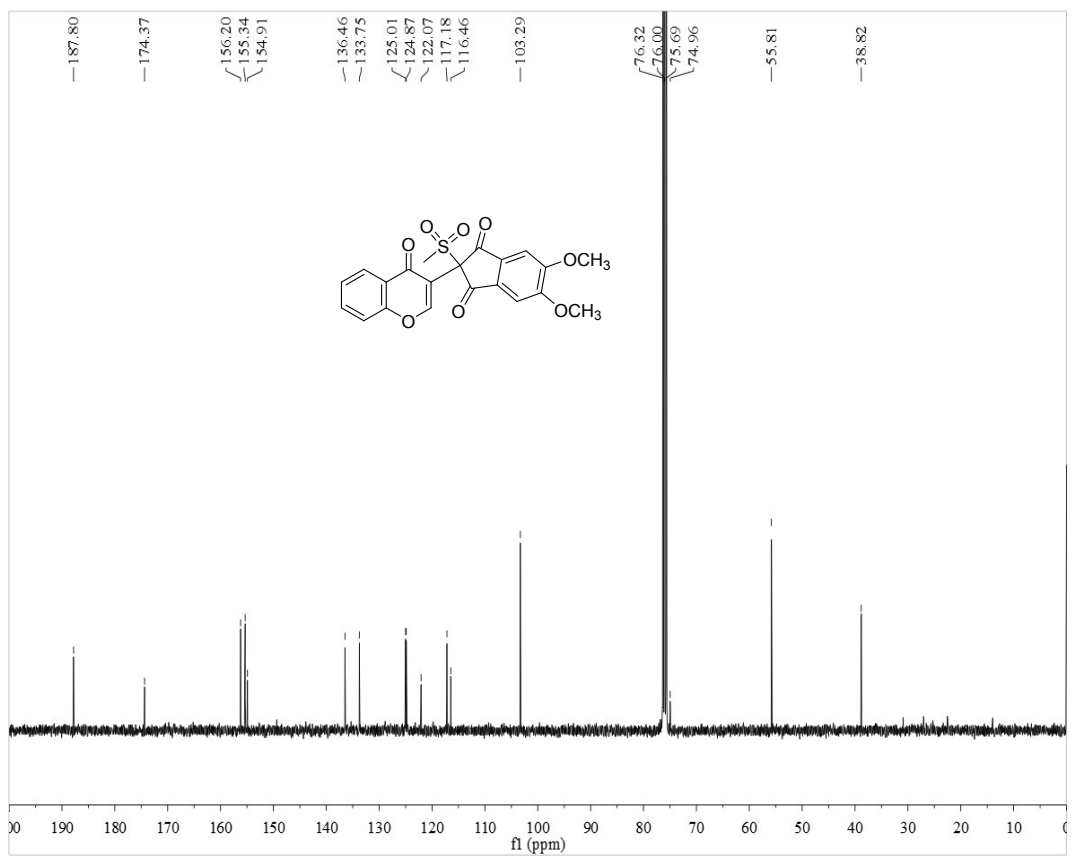

# <sup>1</sup>H and <sup>13</sup>C NMR of 3f

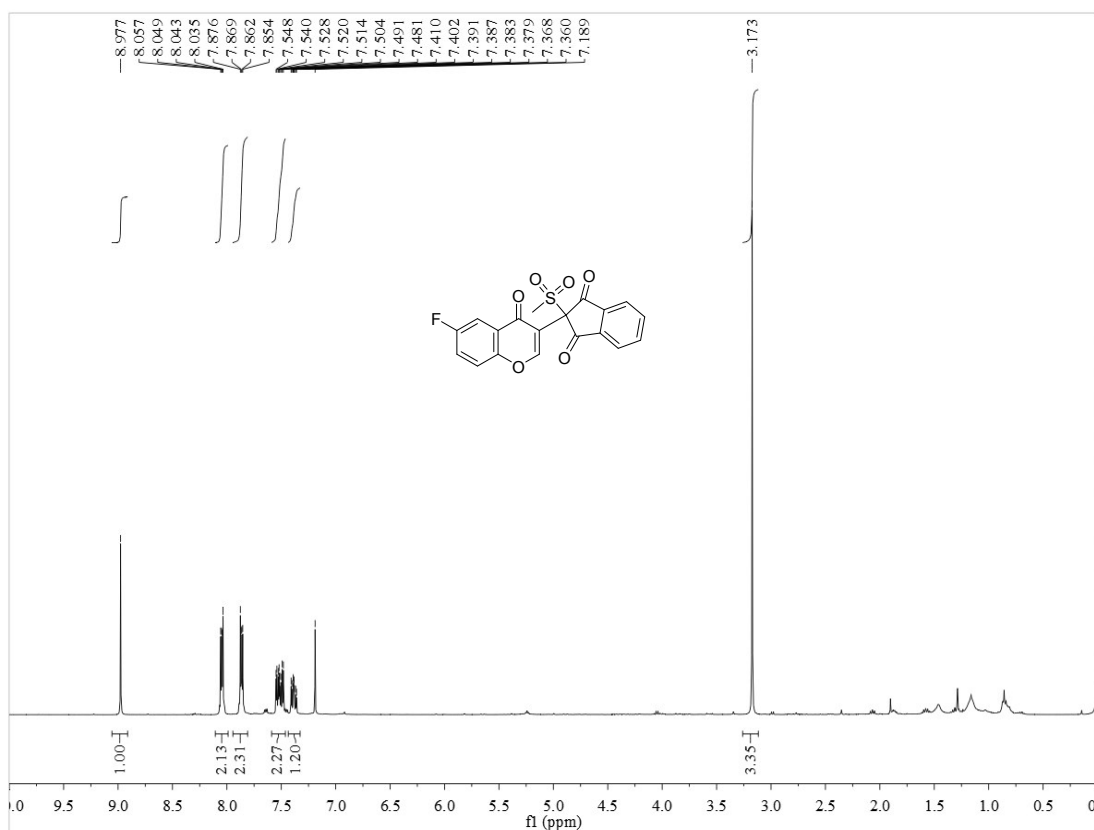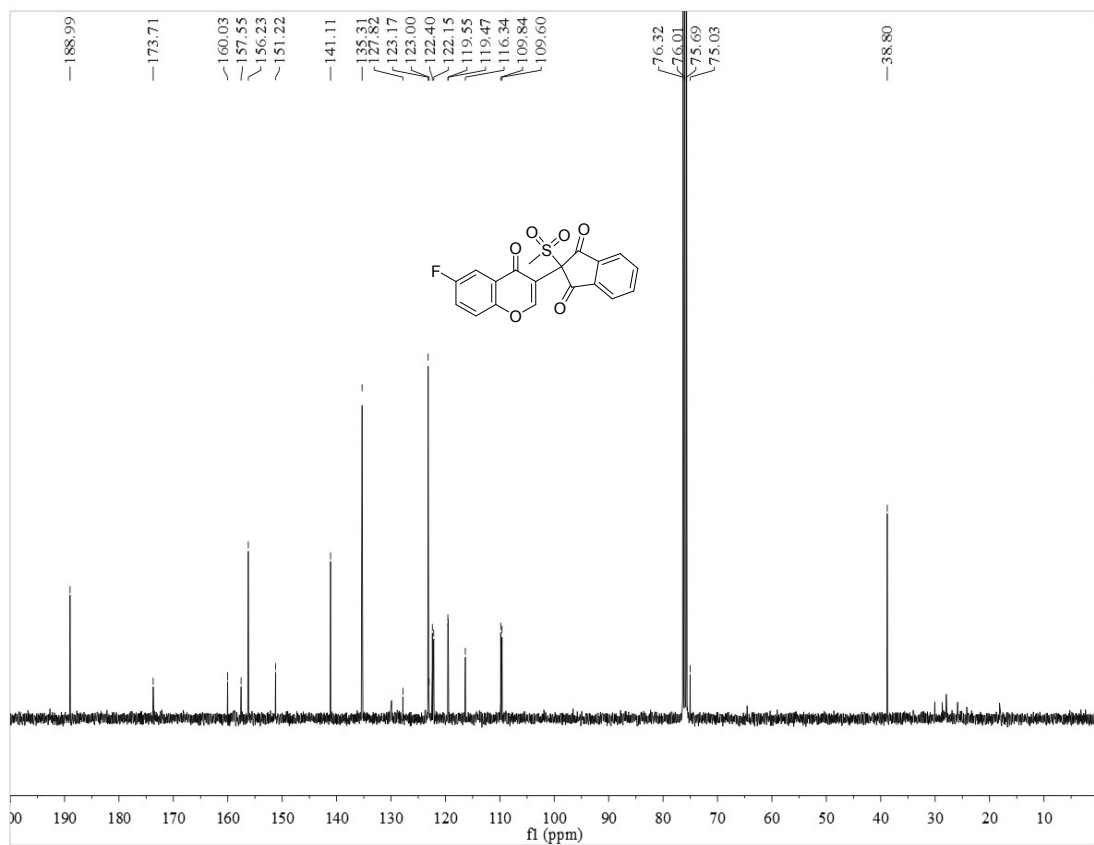

**<sup>19</sup>F NMR of 3f**

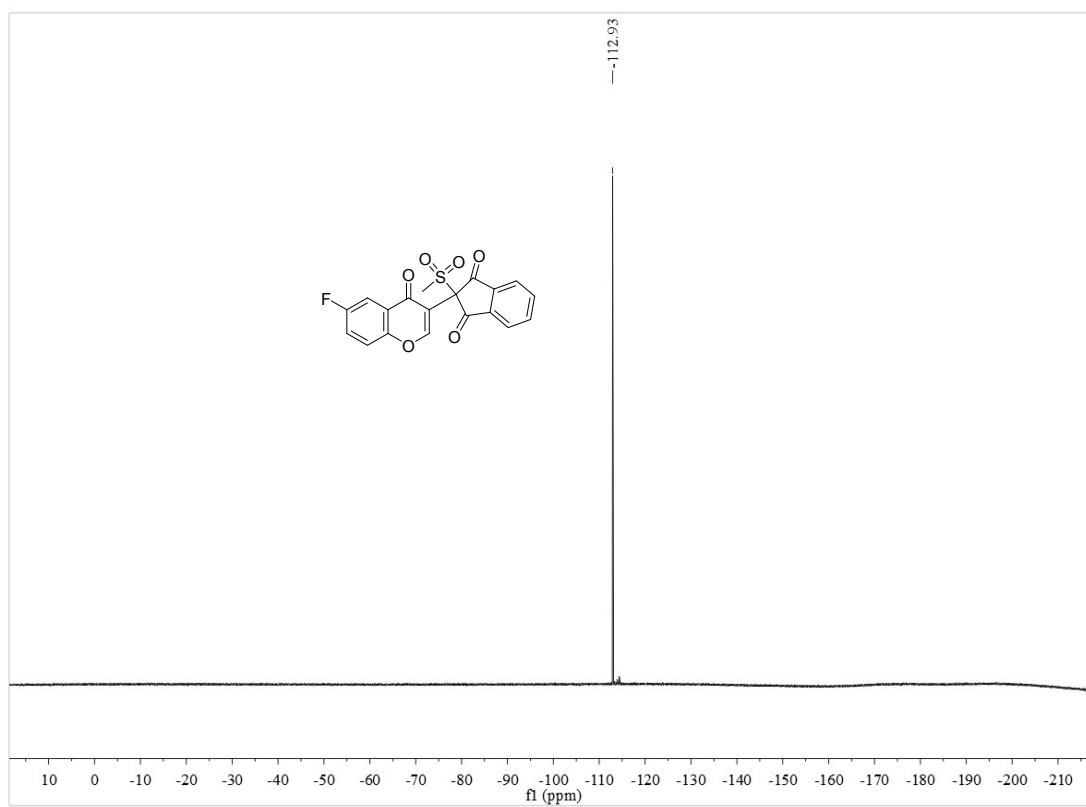

# <sup>1</sup>H and <sup>13</sup>C NMR of 3g

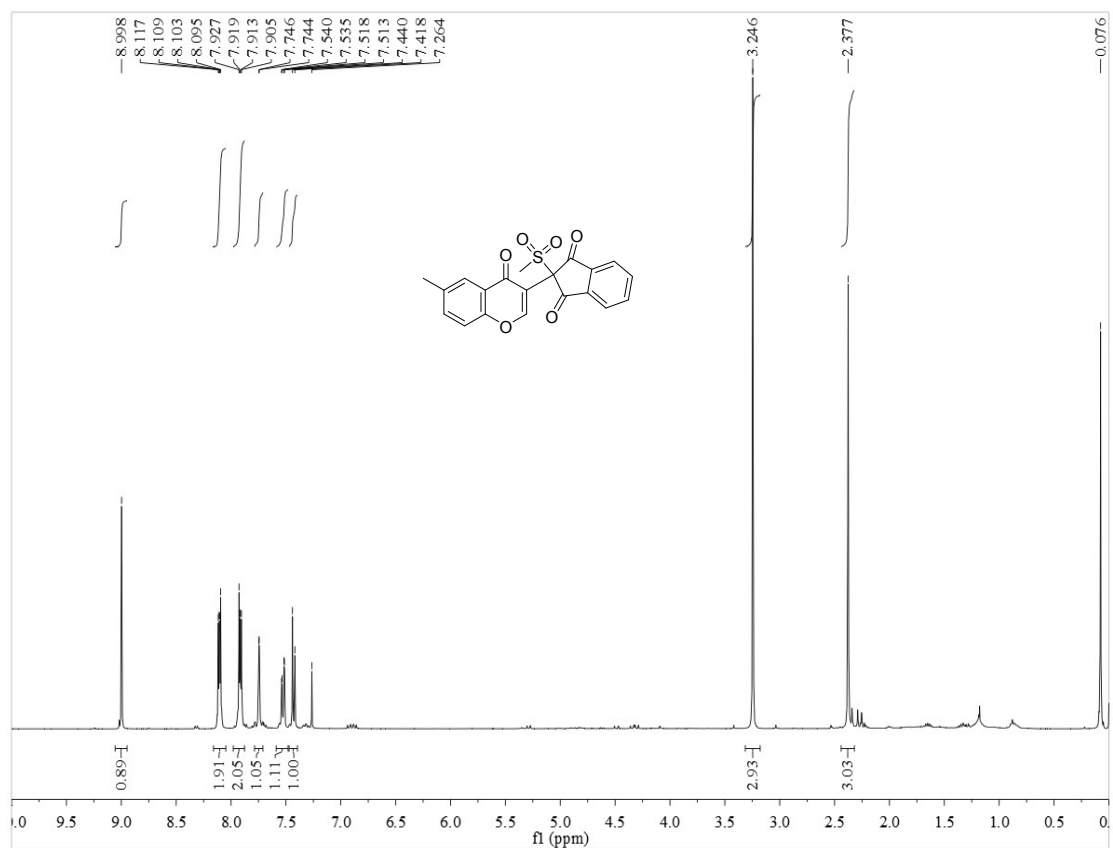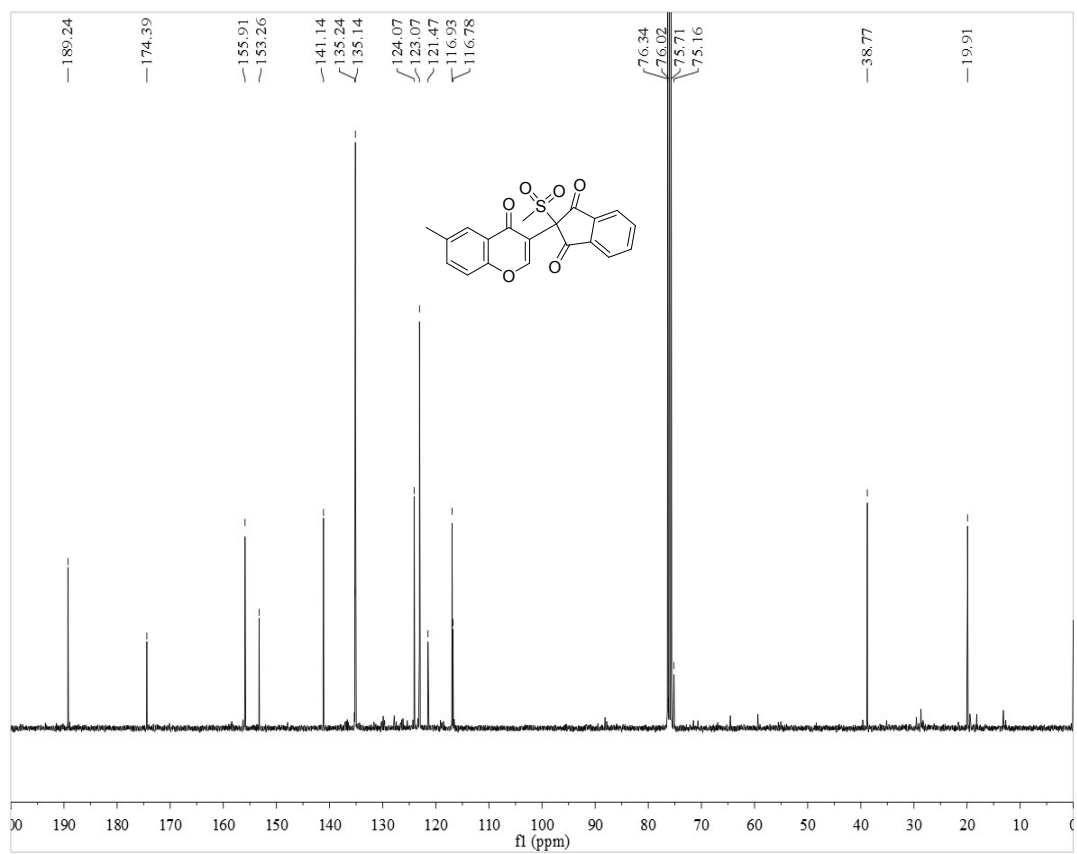

### <sup>1</sup>H and <sup>13</sup>C NMR of 3h

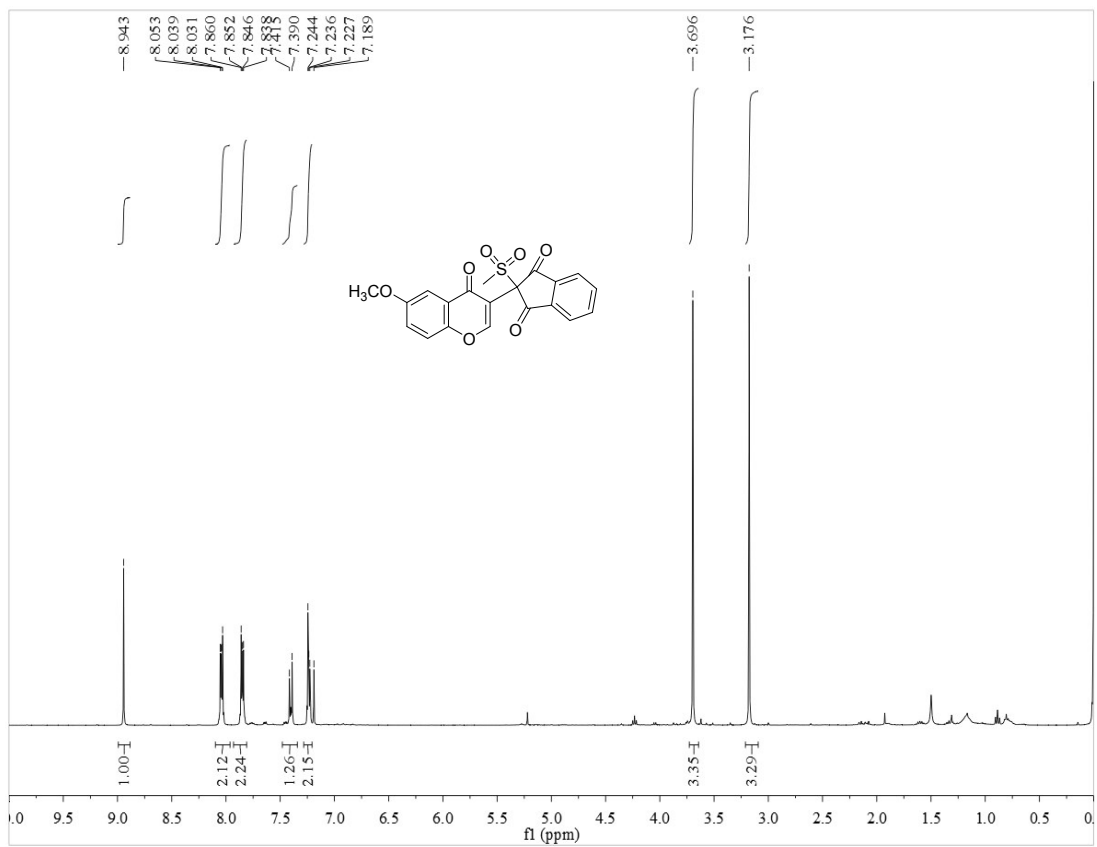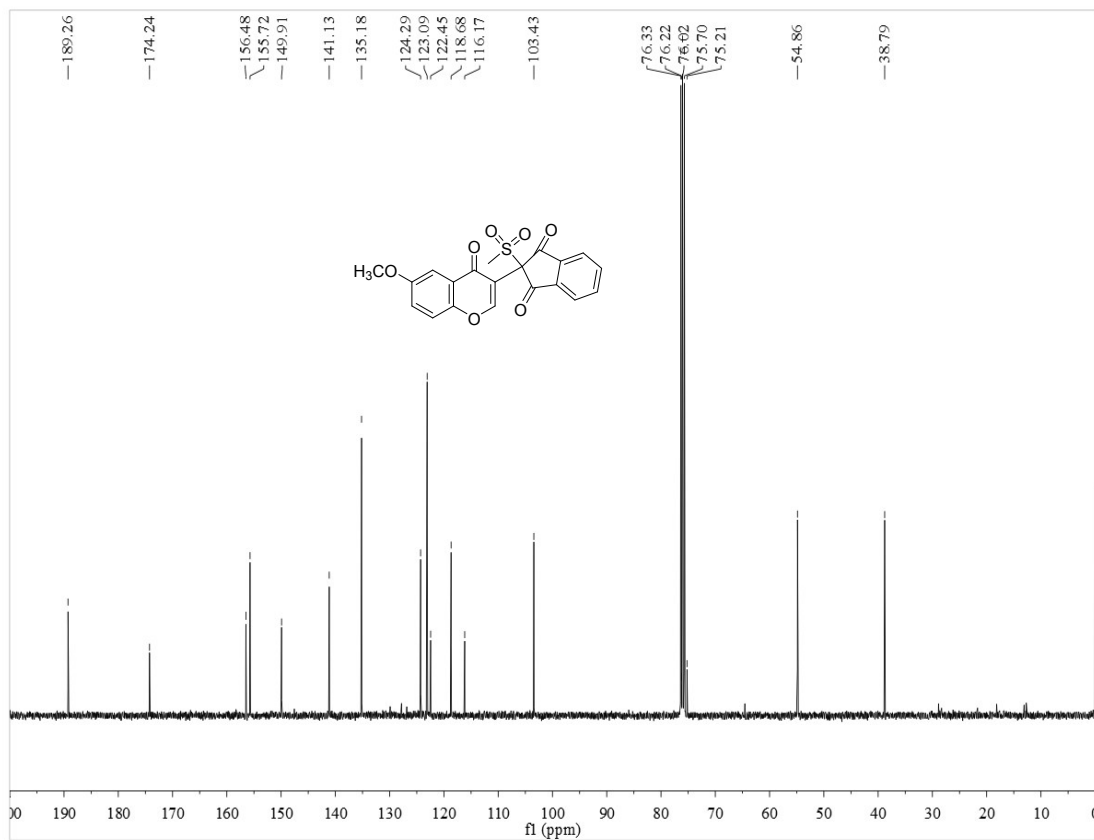

# <sup>1</sup>H and <sup>13</sup>C NMR of 3i

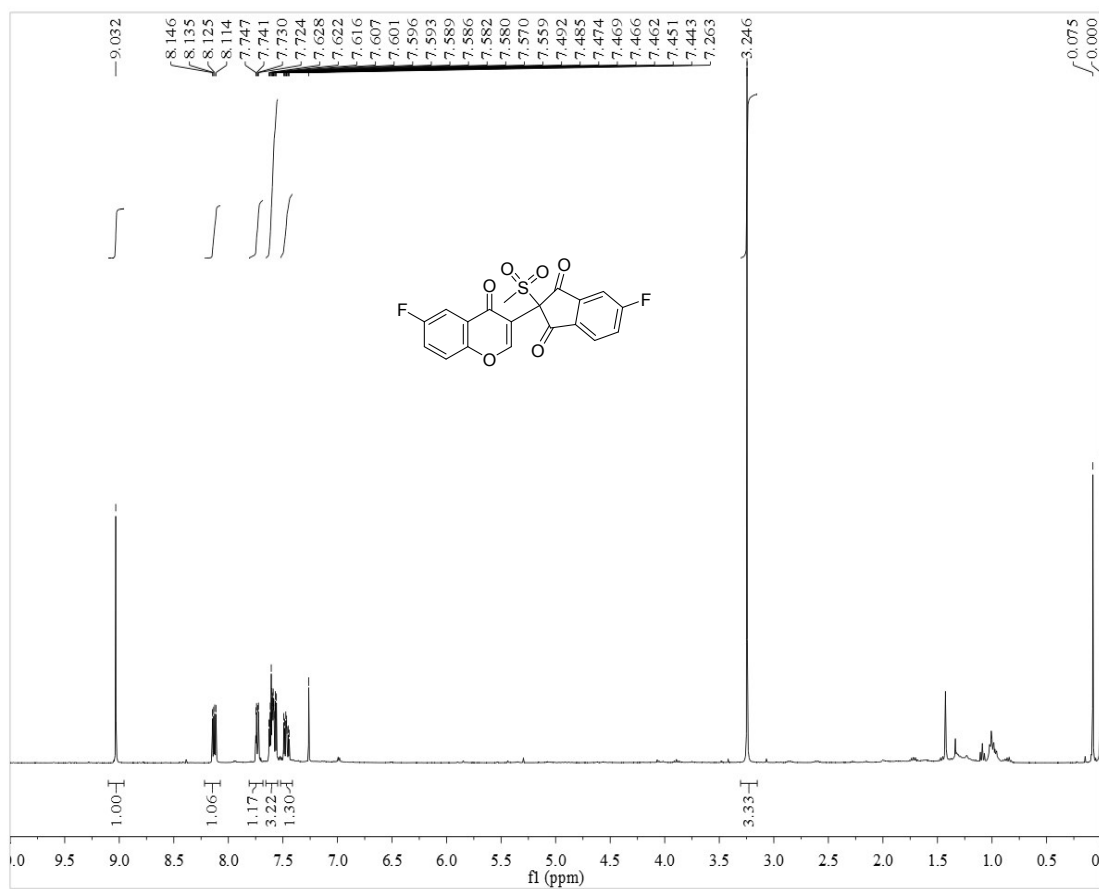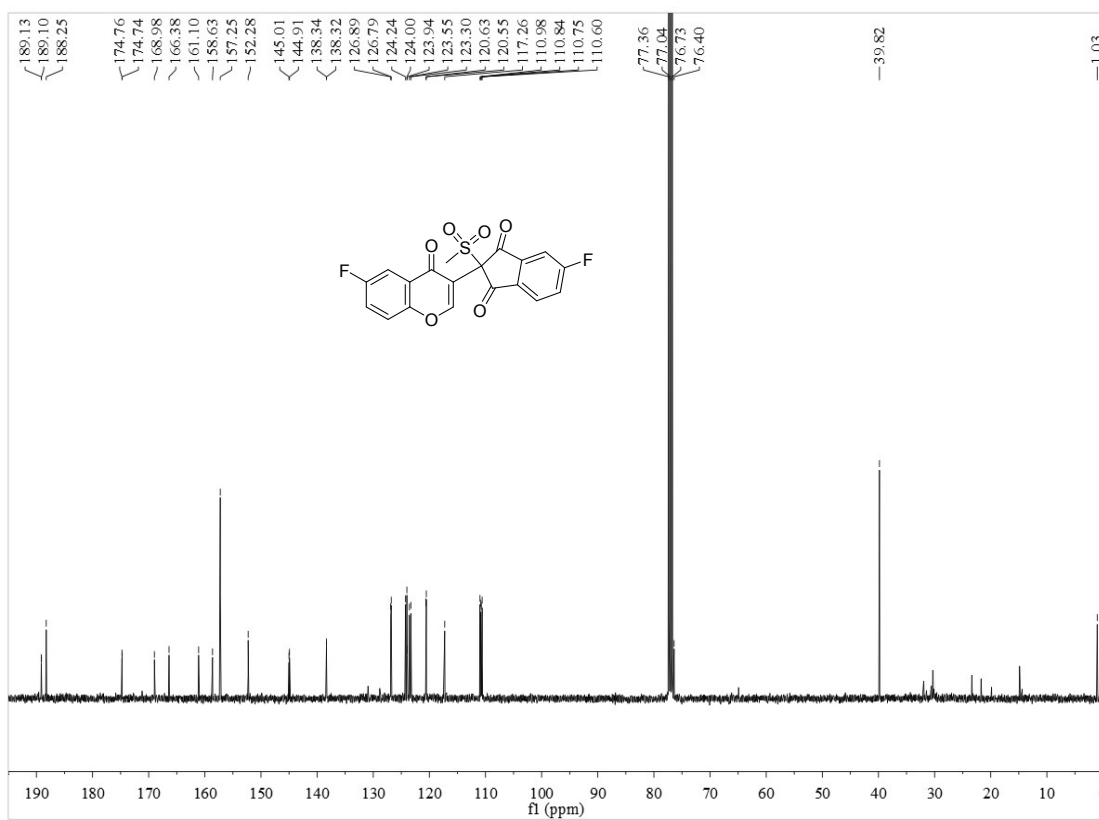

**<sup>19</sup>F NMR of 3i**

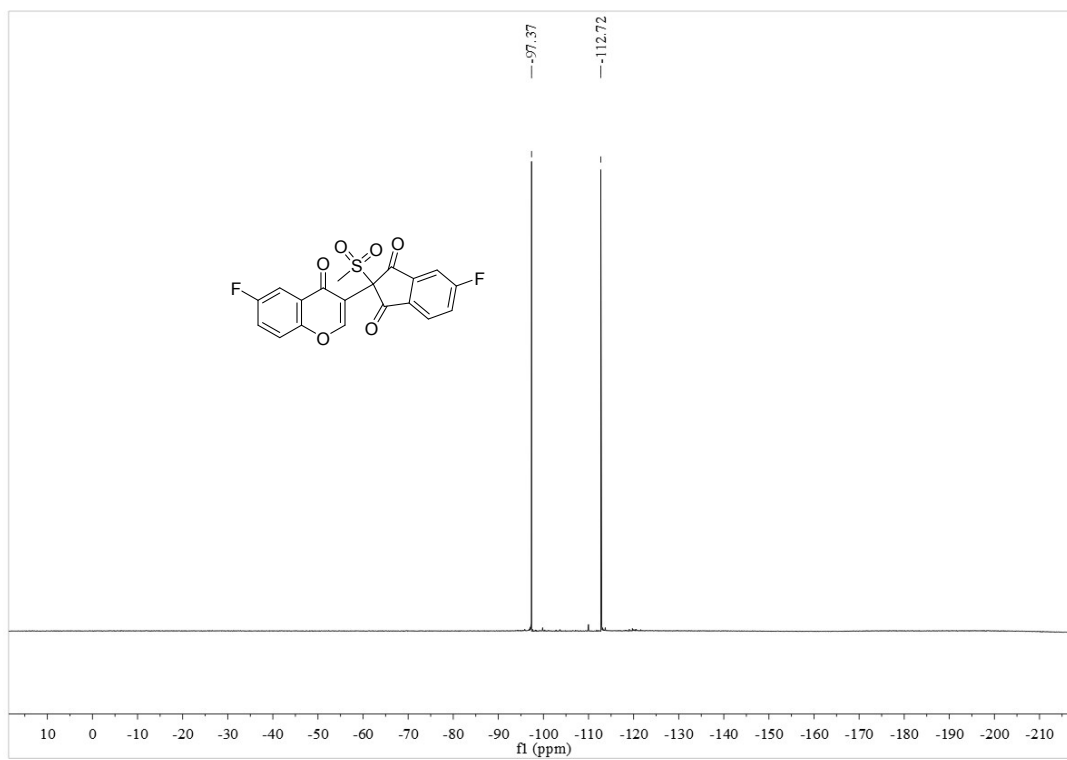



# <sup>1</sup>H and <sup>13</sup>C NMR of 3j

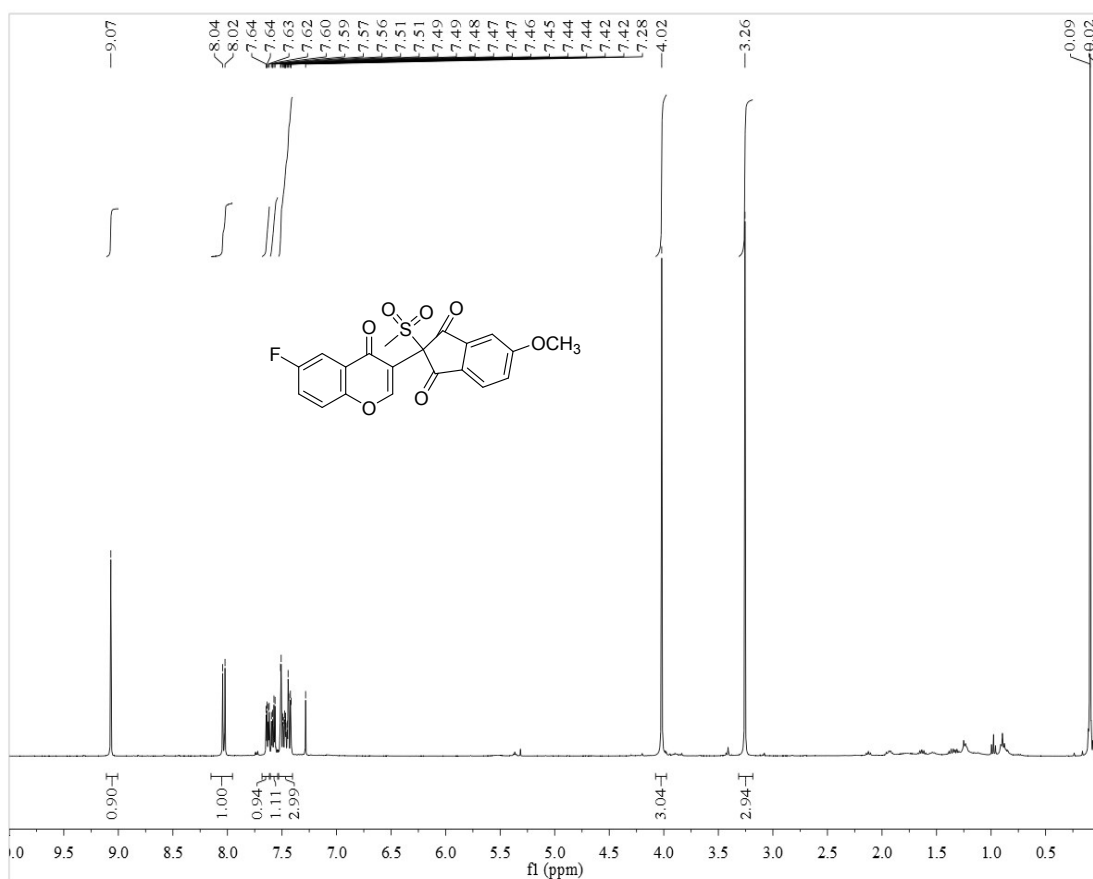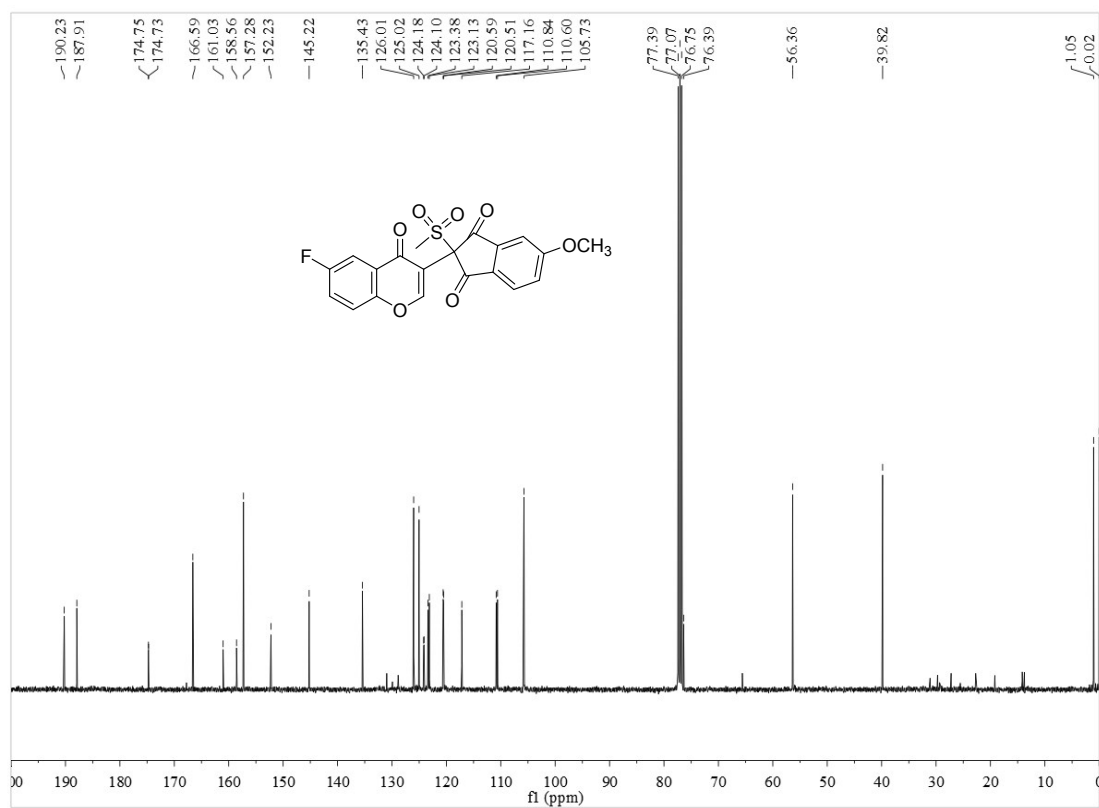

**<sup>19</sup>F NMR of 3j**

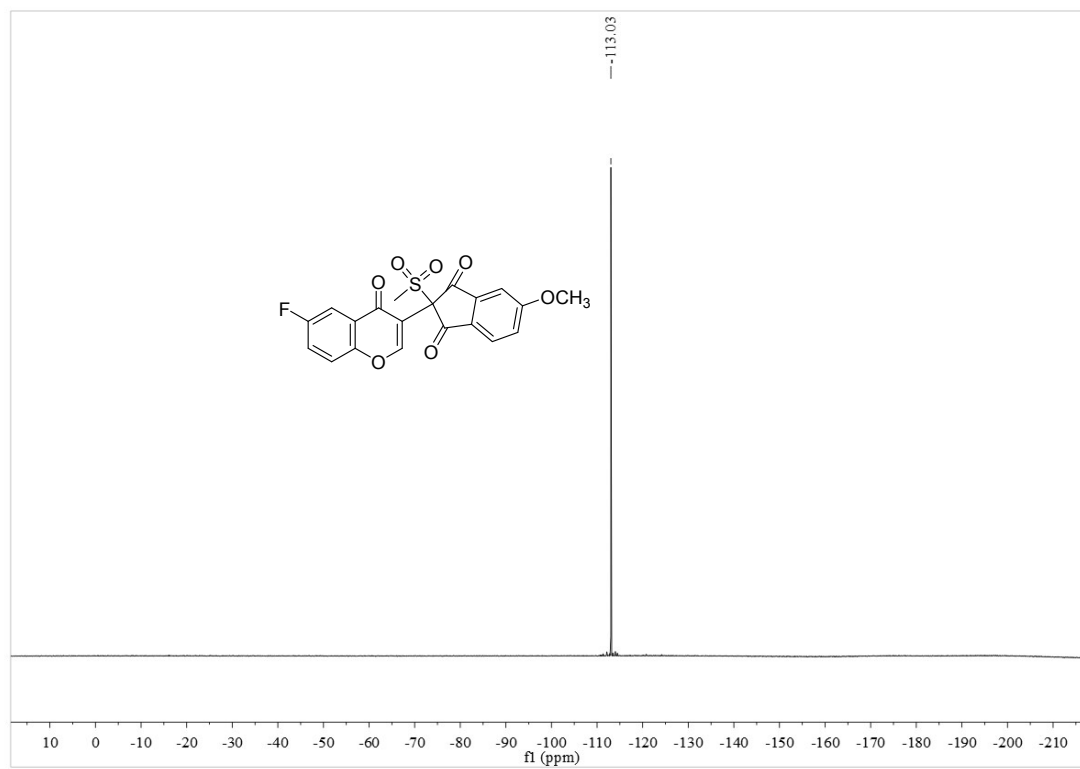

# <sup>1</sup>H and <sup>13</sup>C NMR of 3k

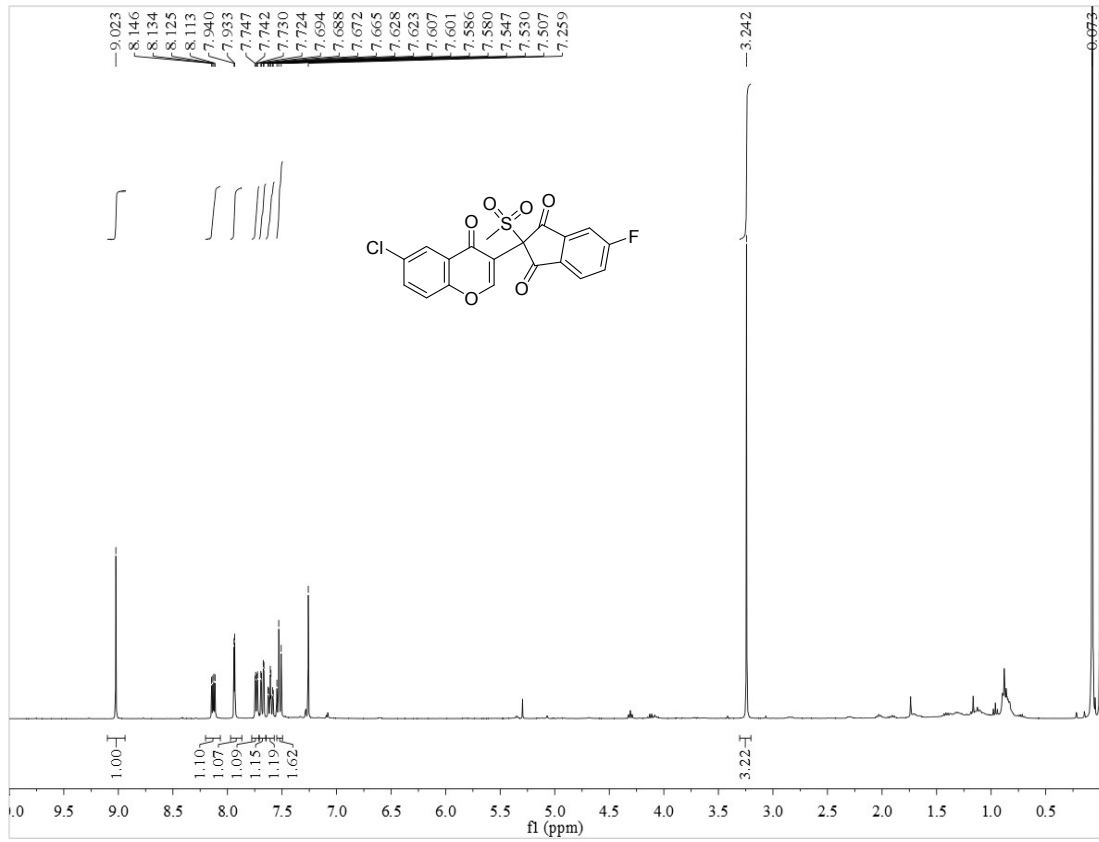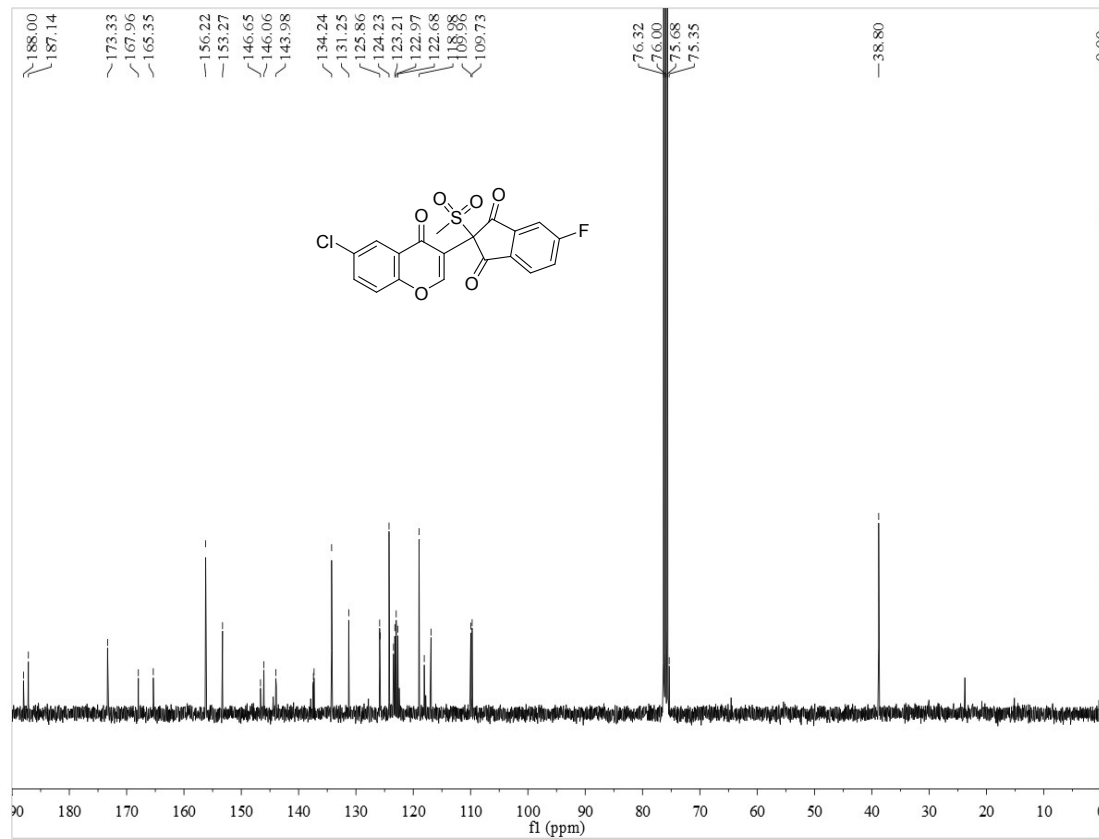

**<sup>19</sup>F NMR of 3k**

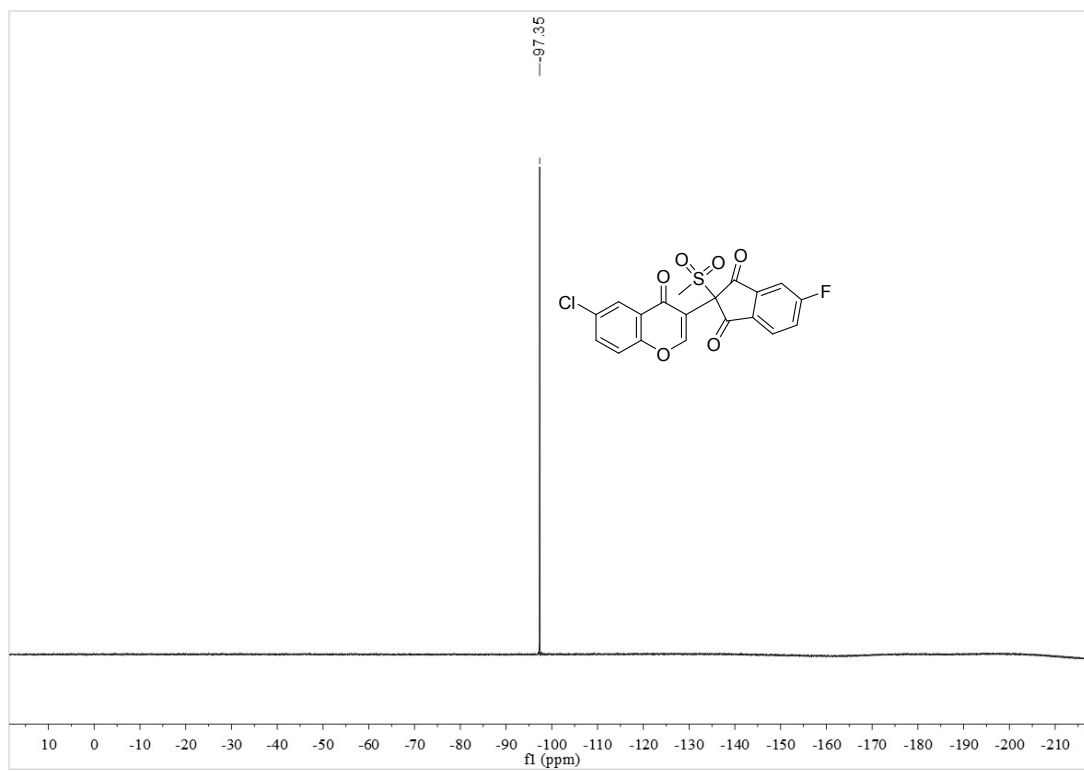

# <sup>1</sup>H and <sup>13</sup>C NMR of 3l

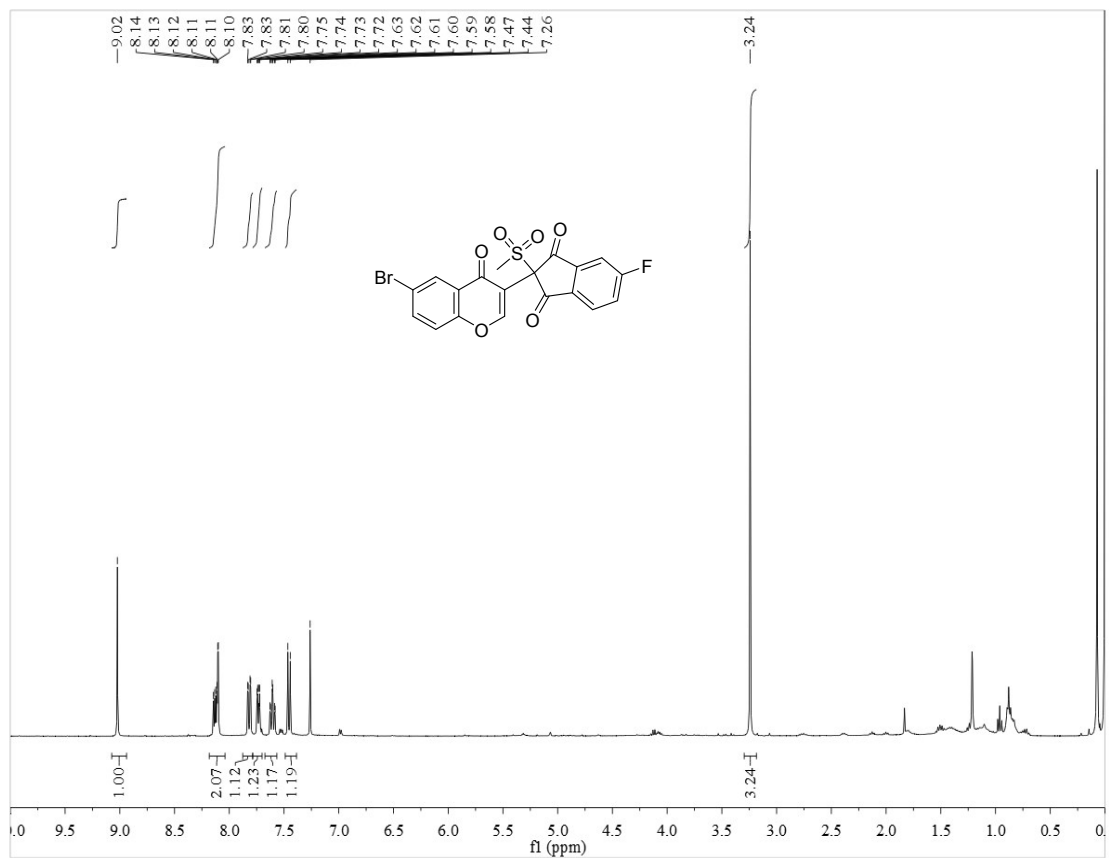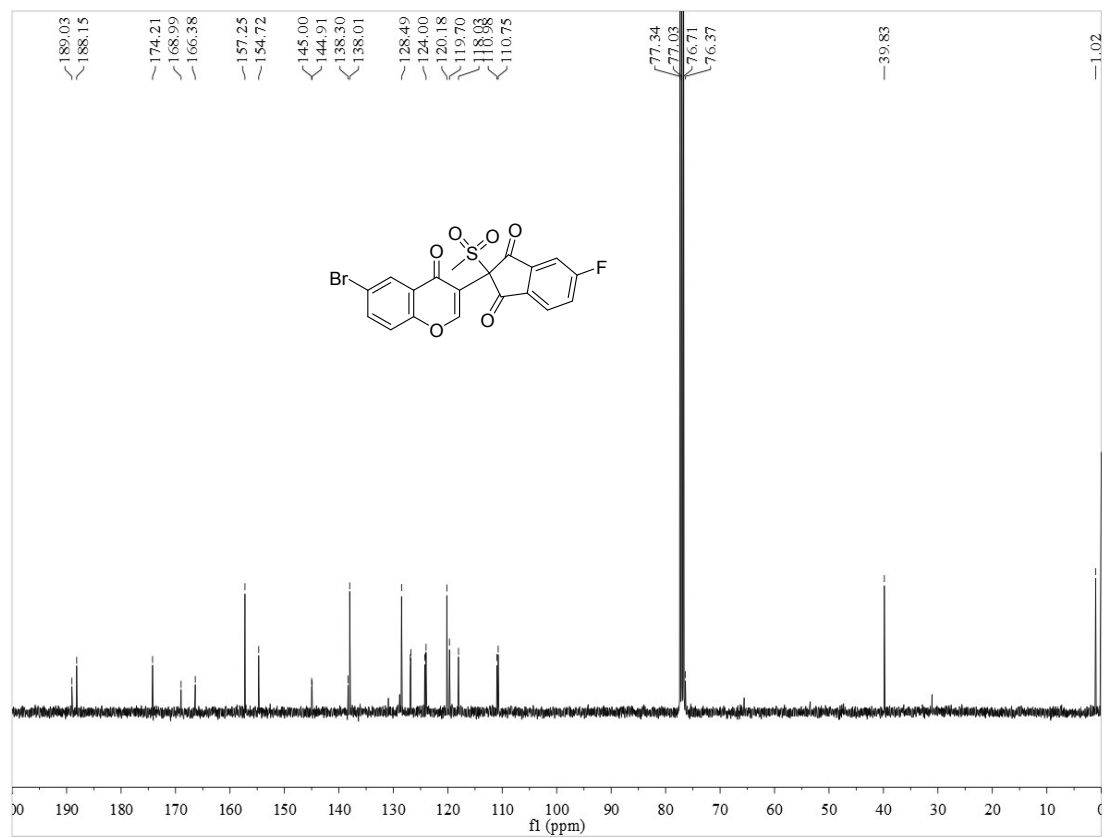

**<sup>19</sup>F NMR of 31**

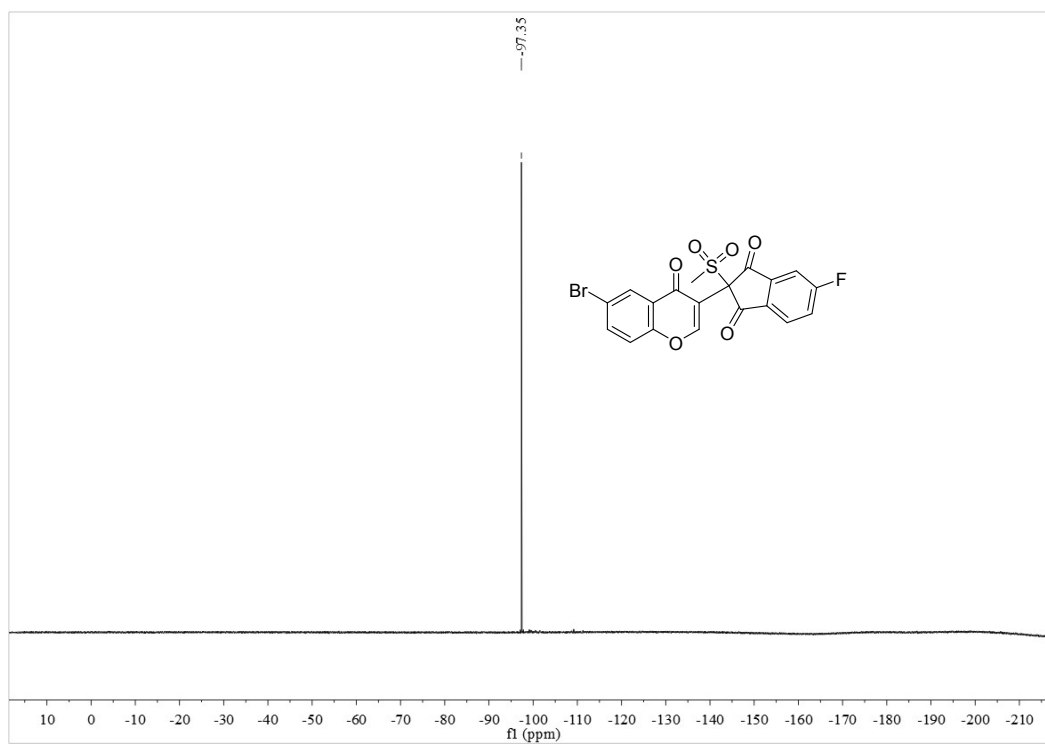

# <sup>1</sup>H and <sup>13</sup>C NMR of 3m

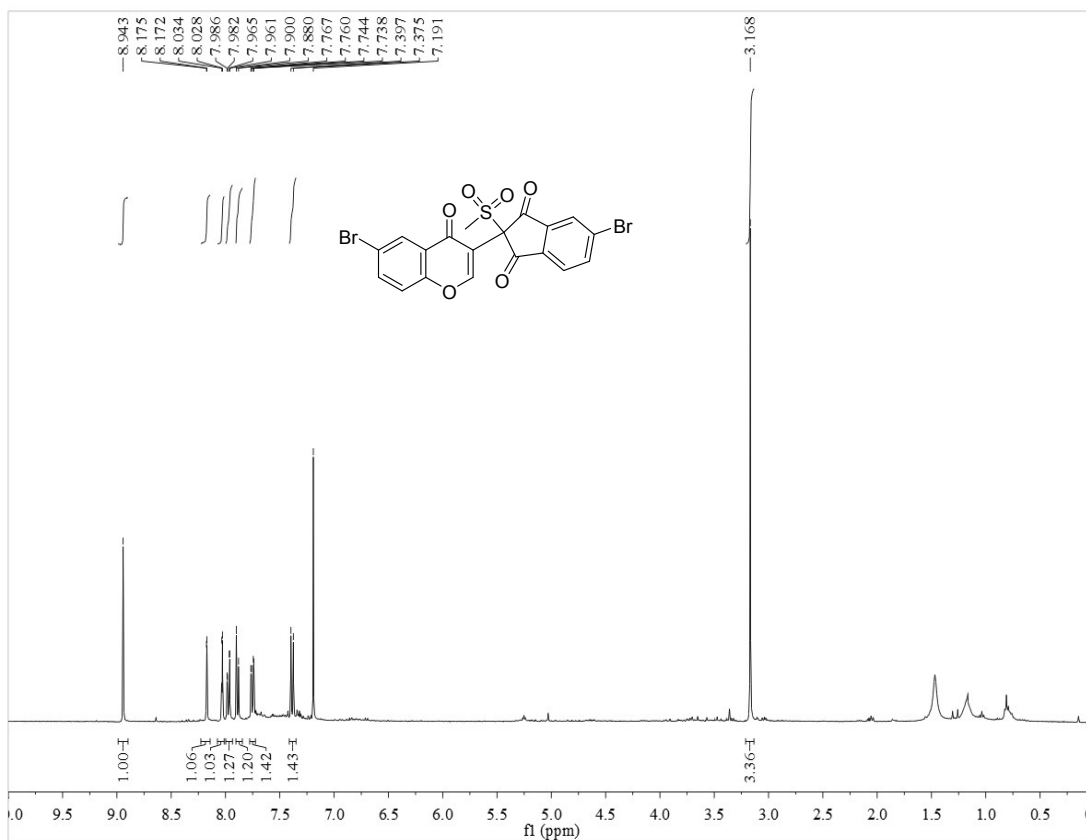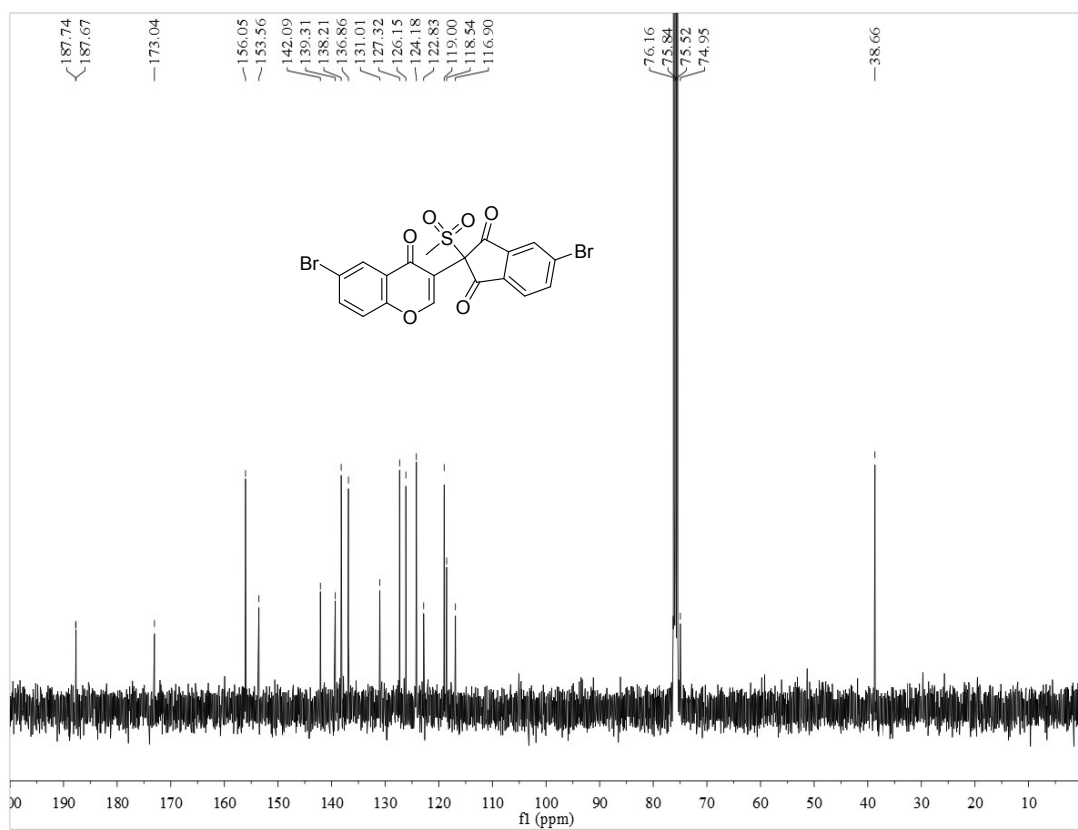

# <sup>1</sup>H and <sup>13</sup>C NMR of 3n

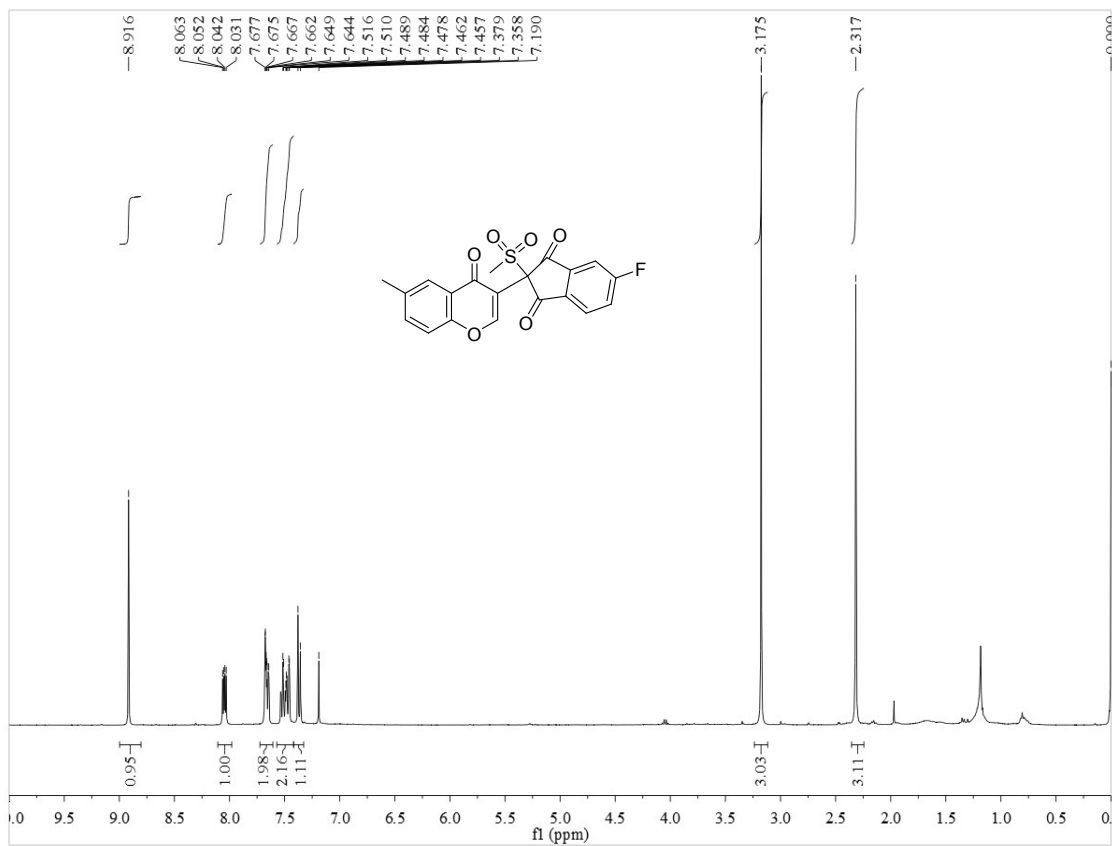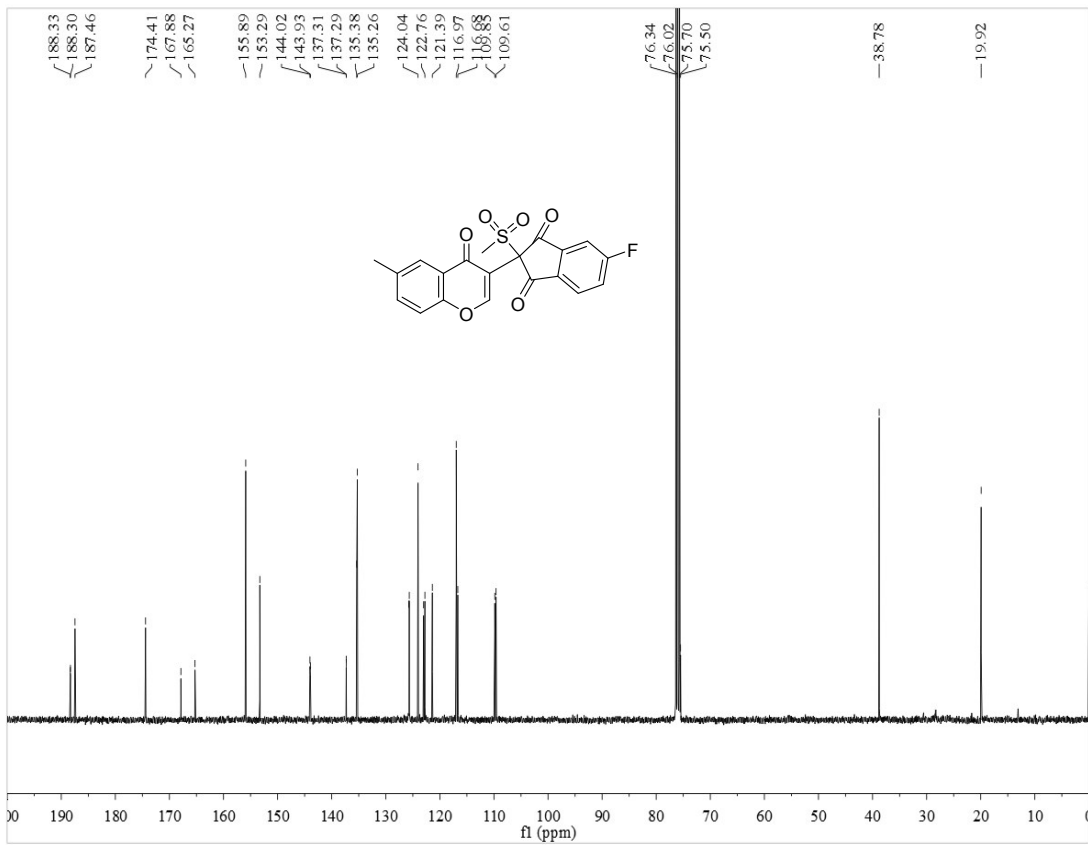



**<sup>19</sup>F NMR of 3n**

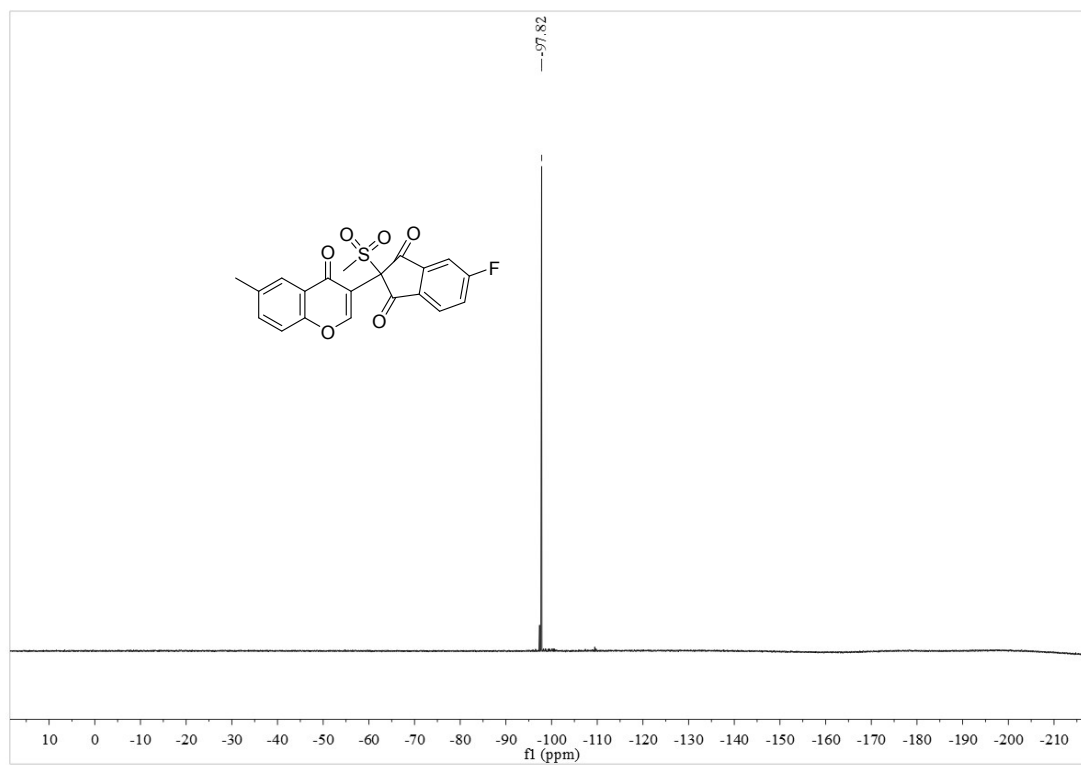

# <sup>1</sup>H and <sup>13</sup>C NMR of 3o

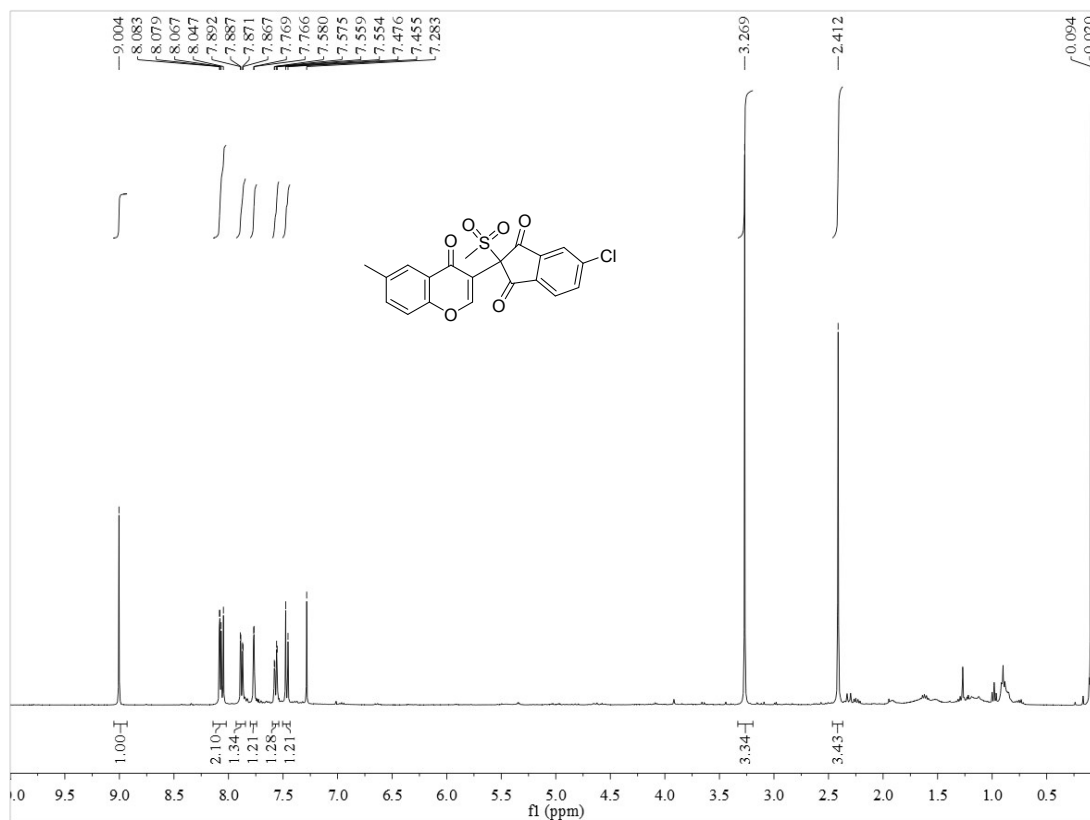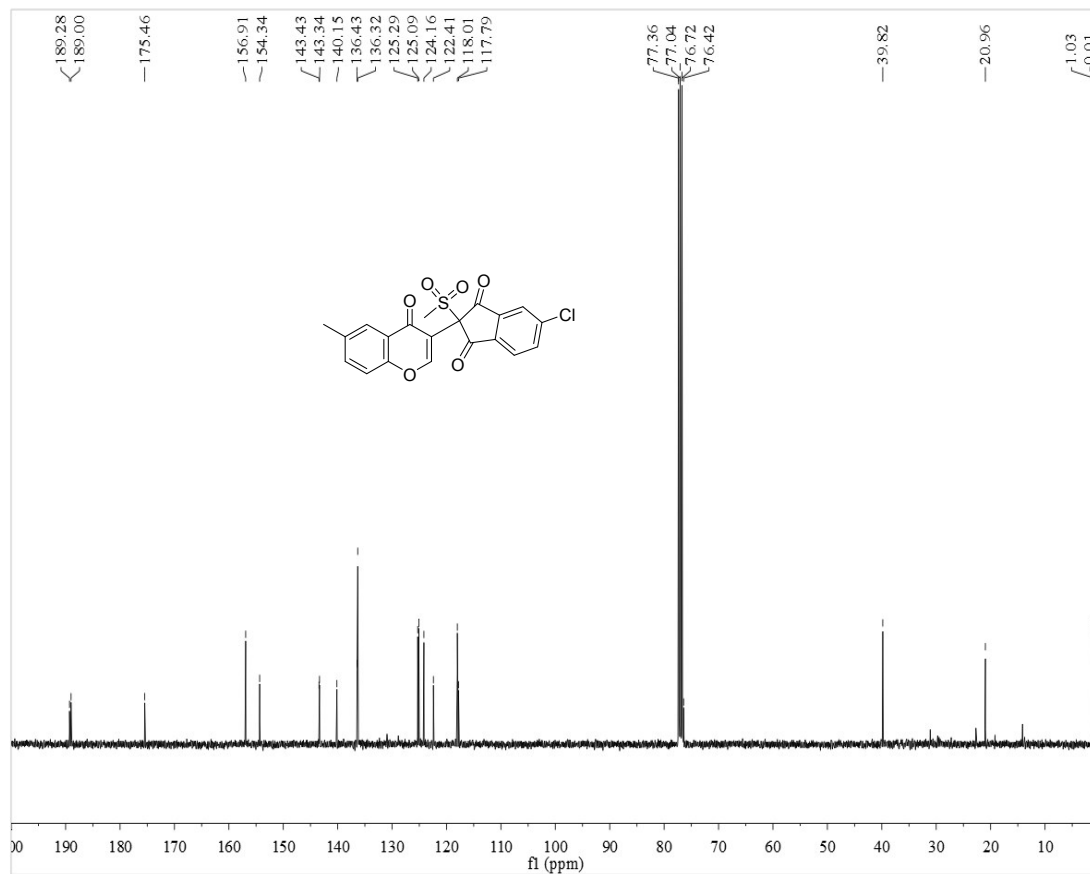

### <sup>1</sup>H and <sup>13</sup>C NMR of 3p

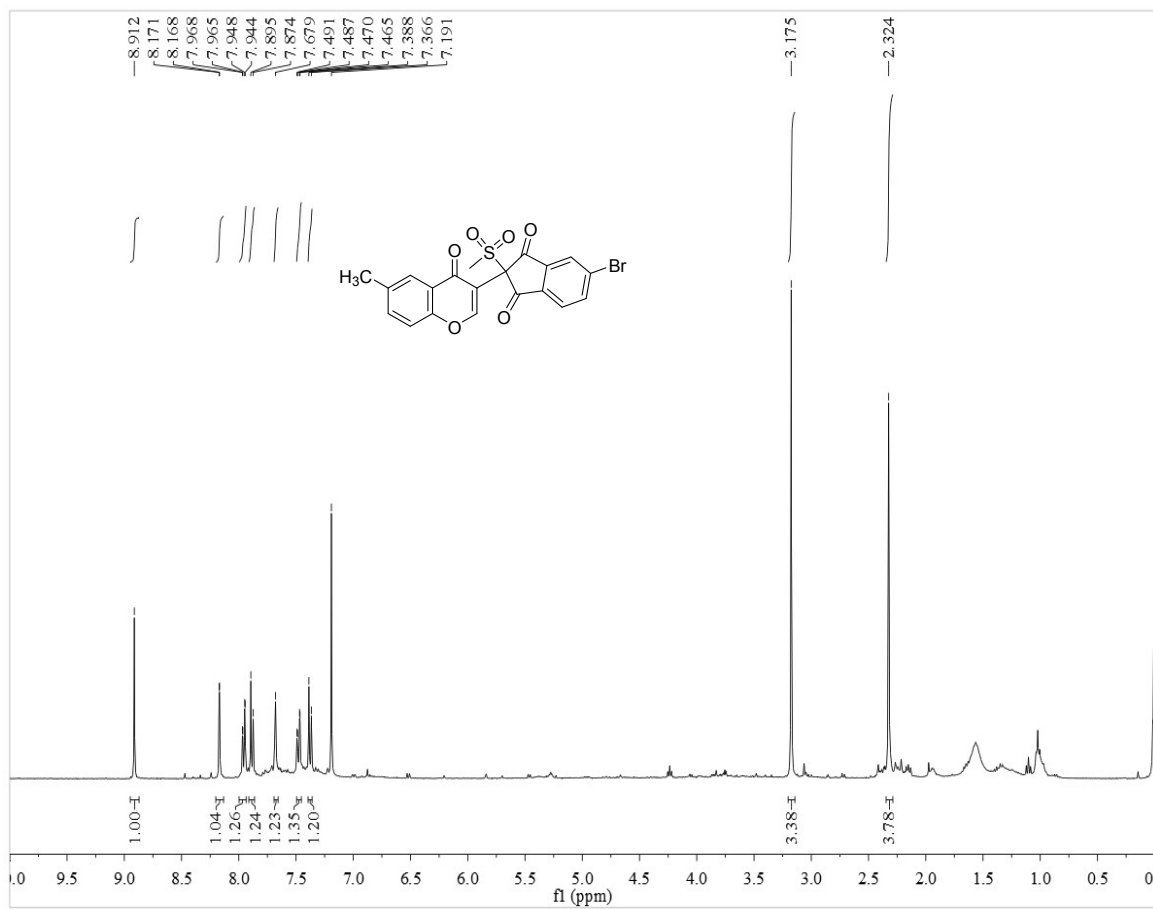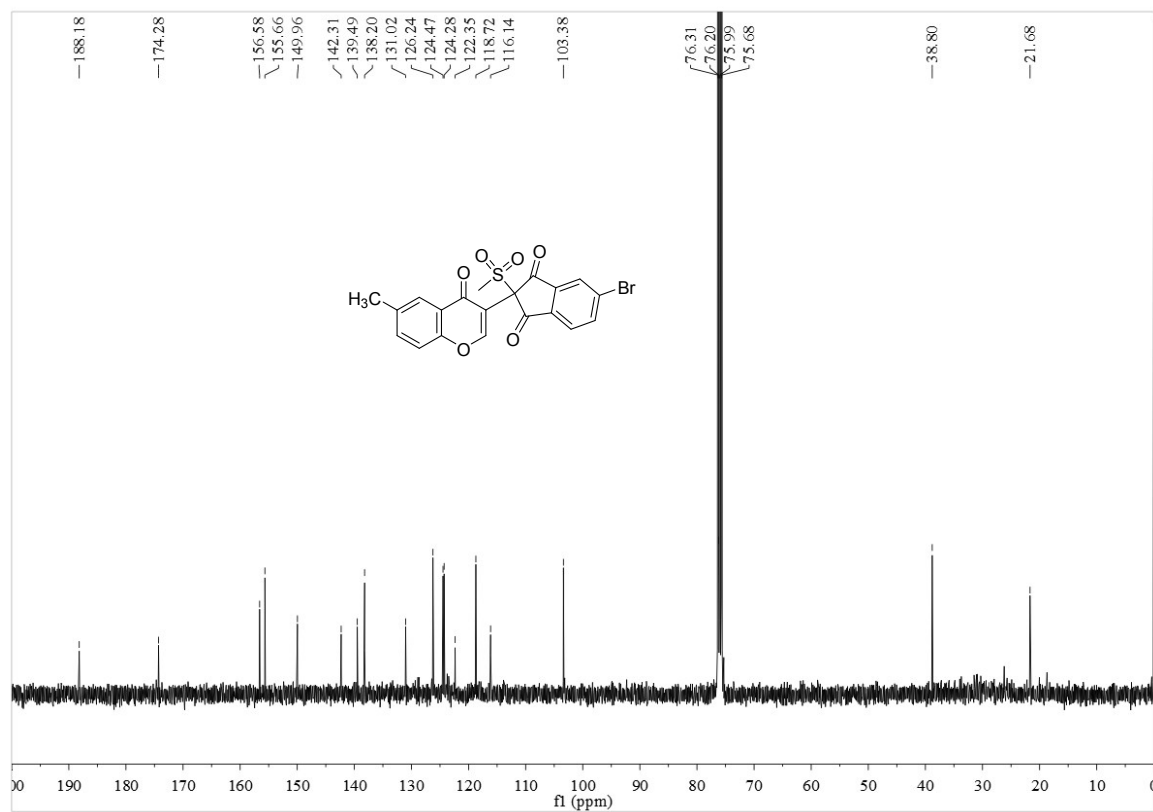

# <sup>1</sup>H and <sup>13</sup>C NMR of 3q

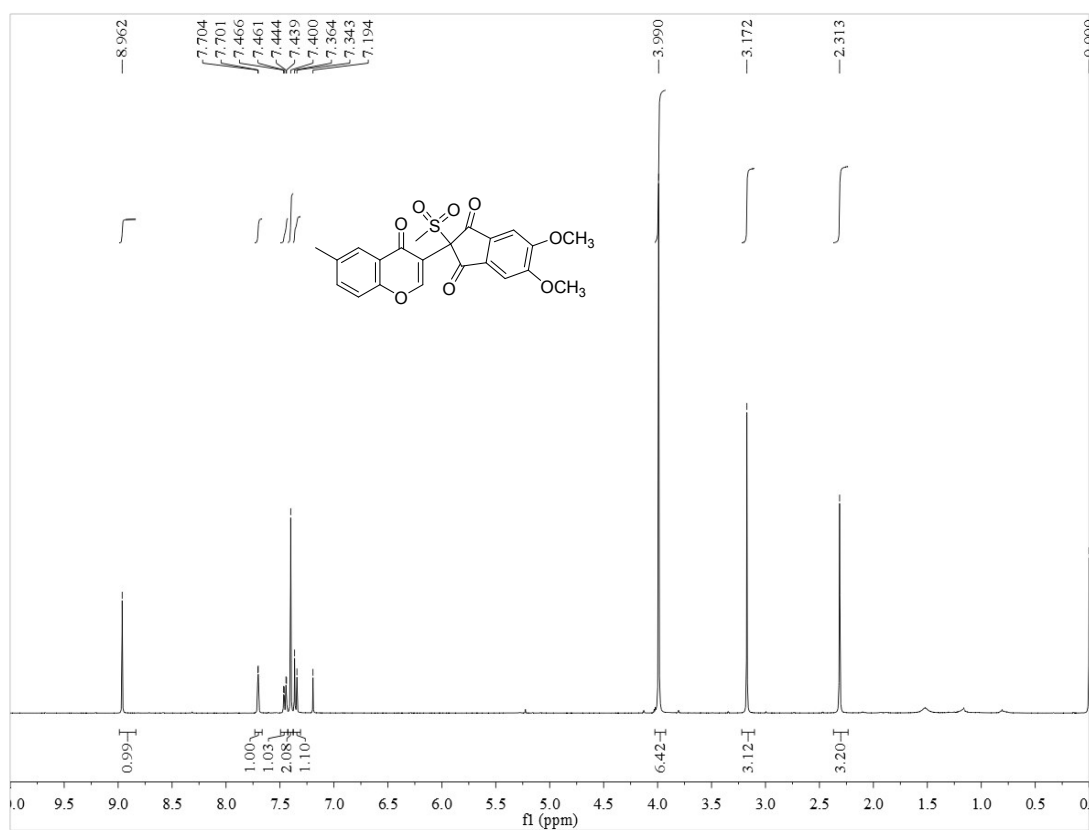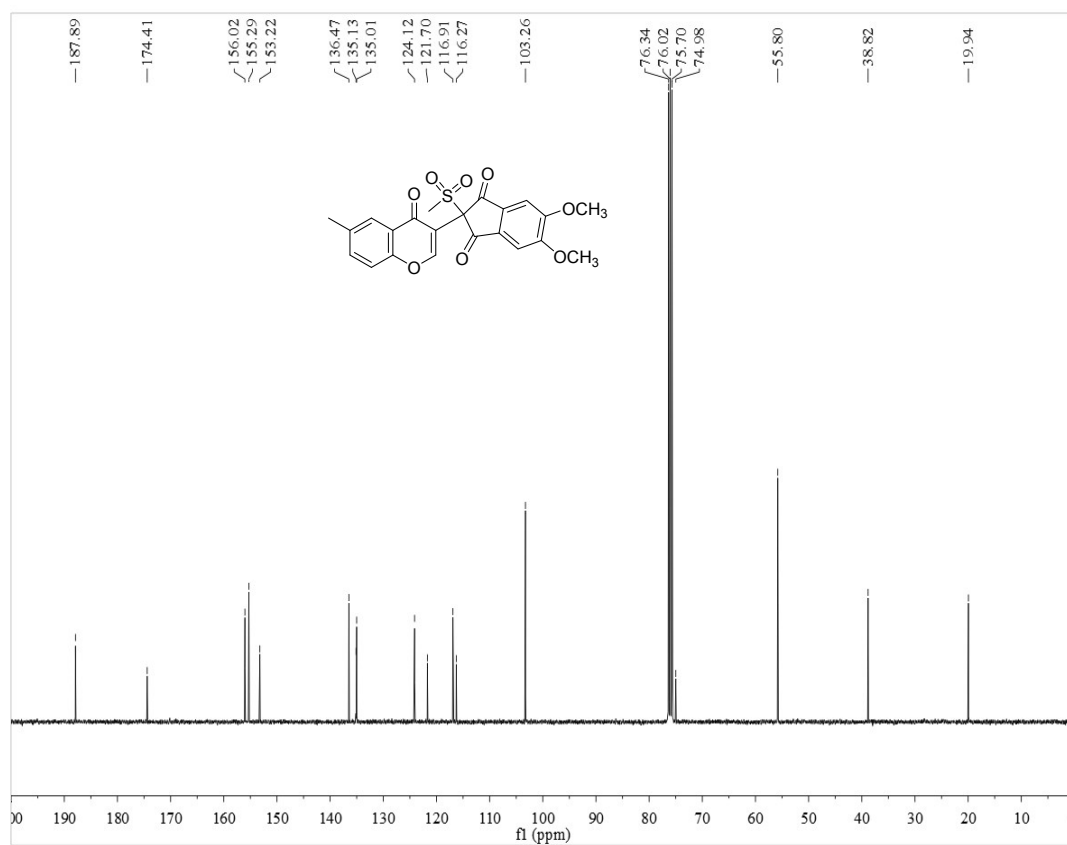

# <sup>1</sup>H and <sup>13</sup>C NMR of 3r

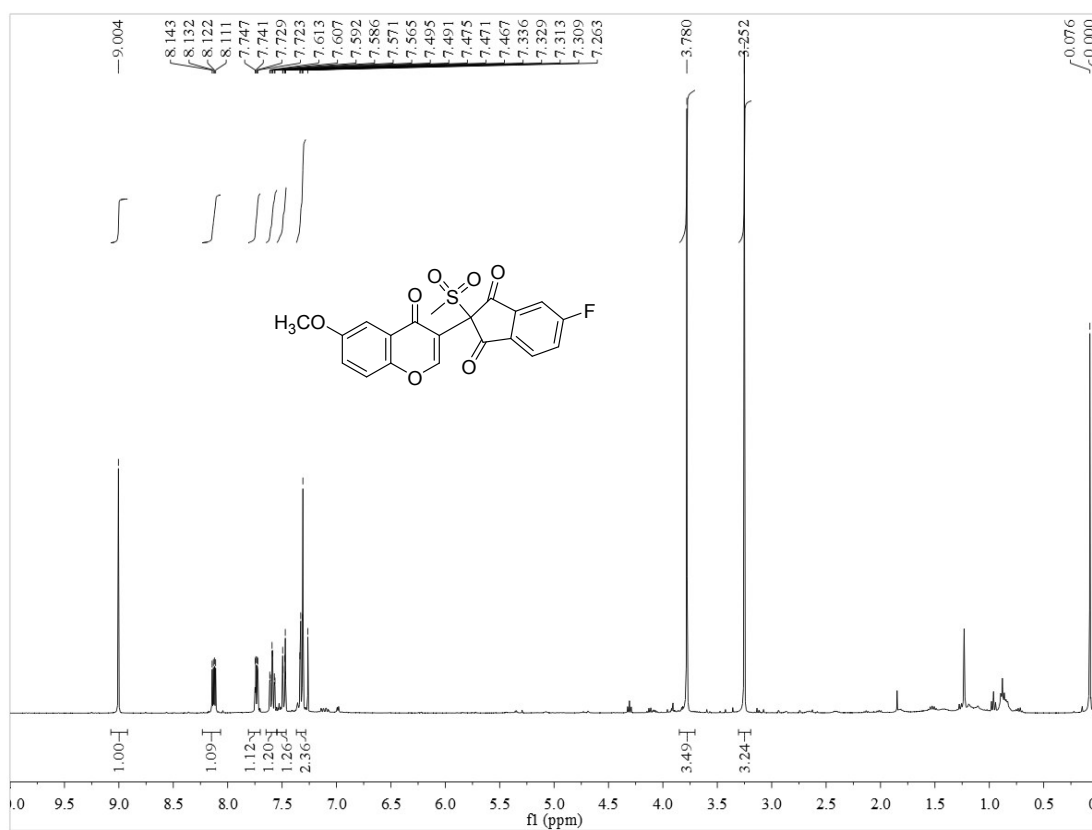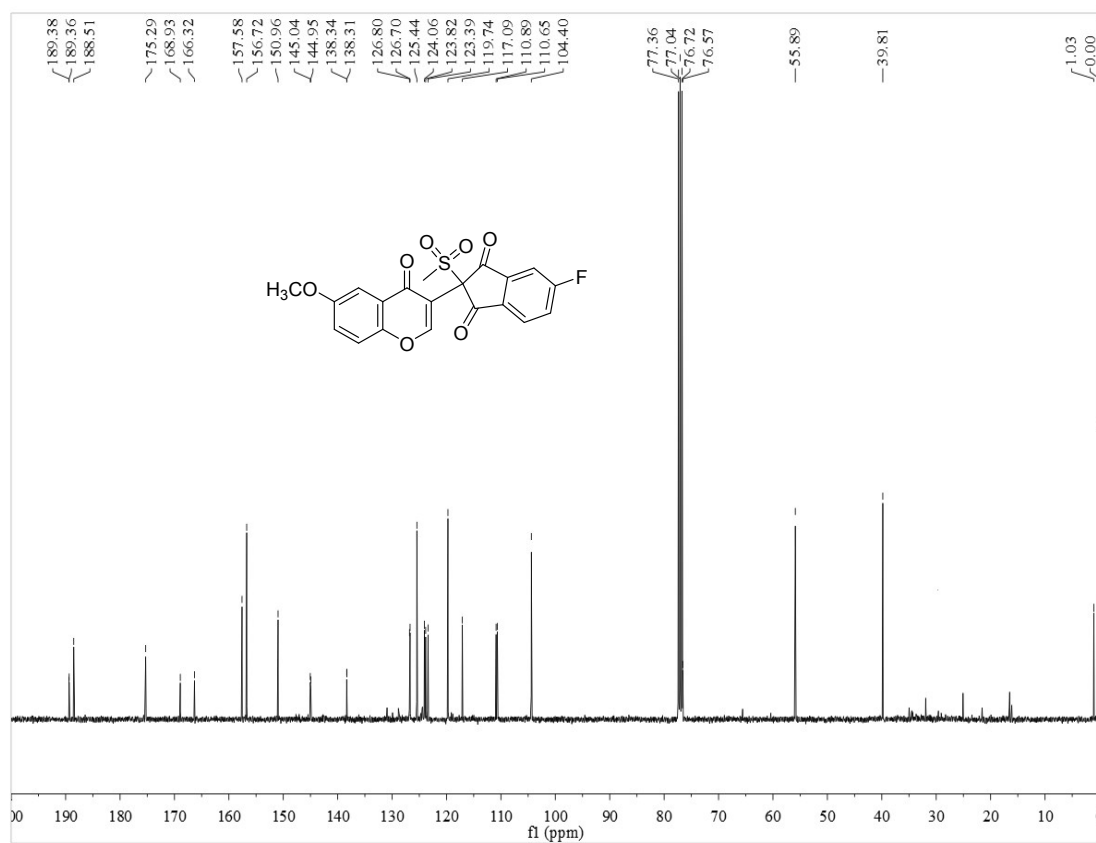

**<sup>19</sup>F NMR of 3r**

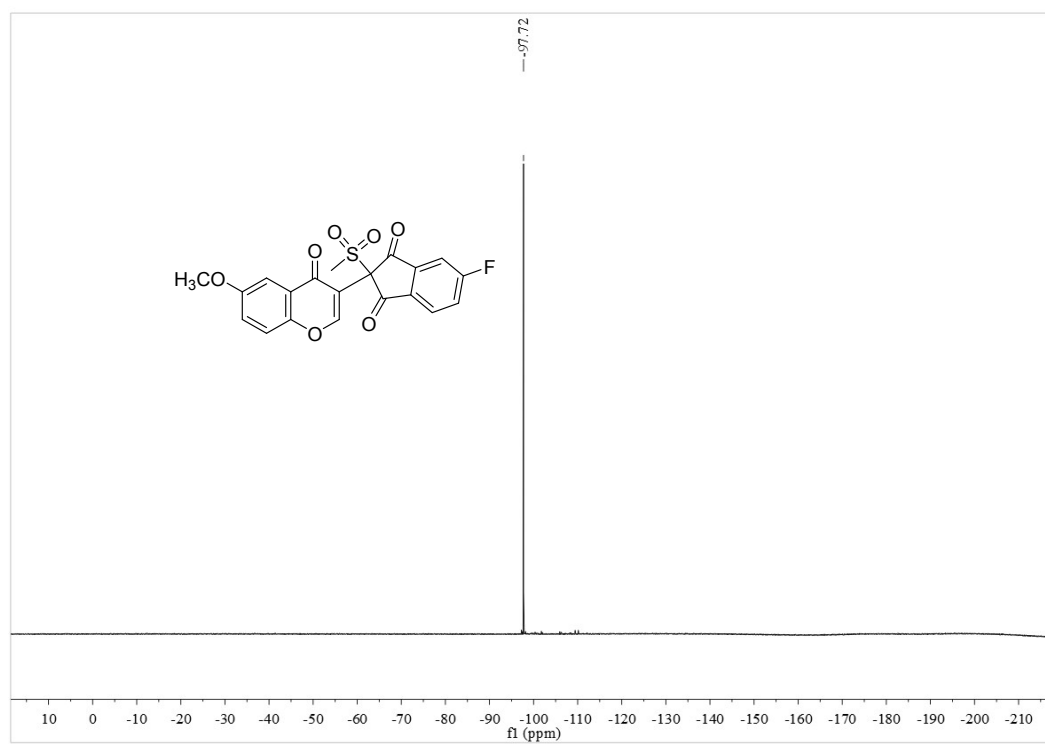

# <sup>1</sup>H and <sup>13</sup>C NMR of 3s

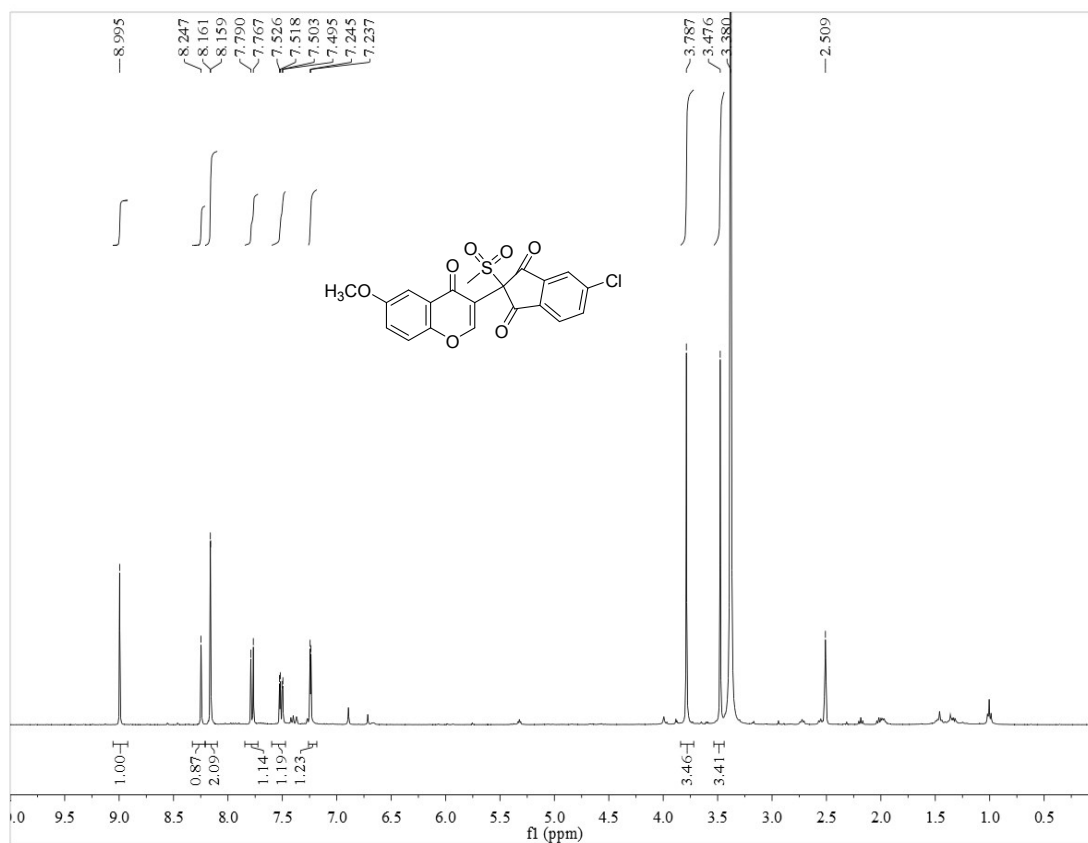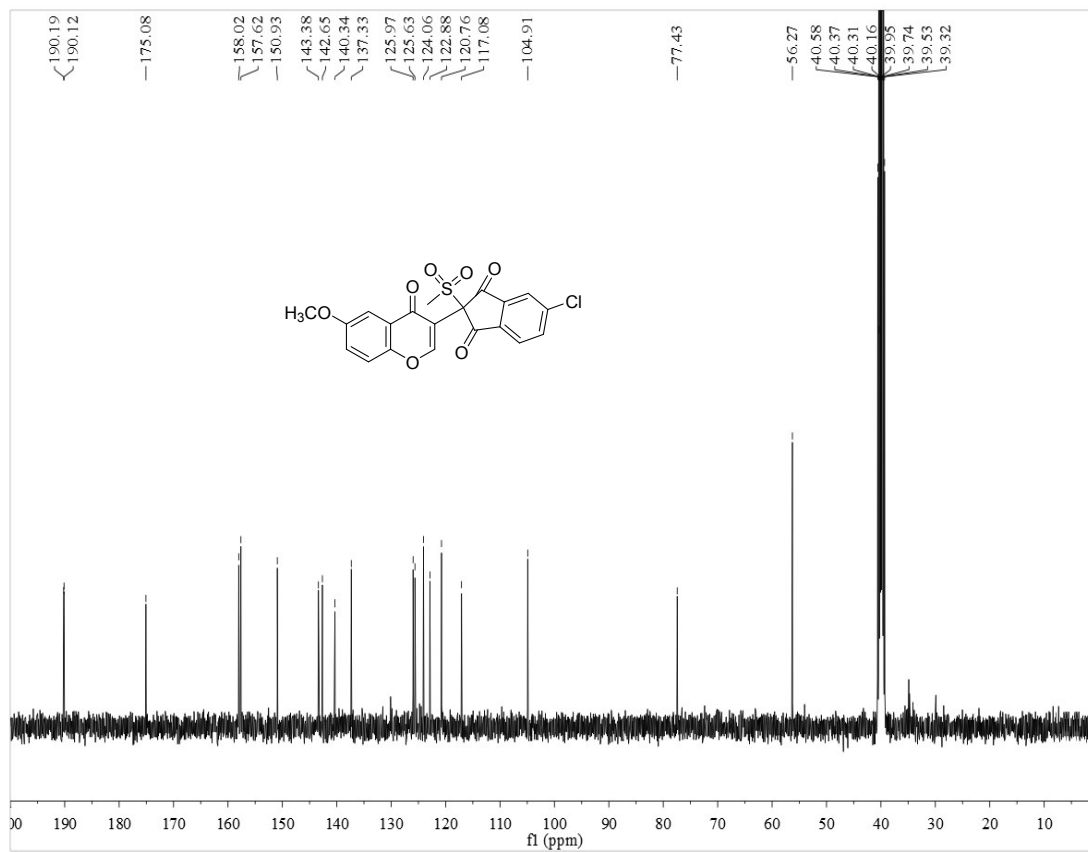

# <sup>1</sup>H and <sup>13</sup>C NMR of 3t

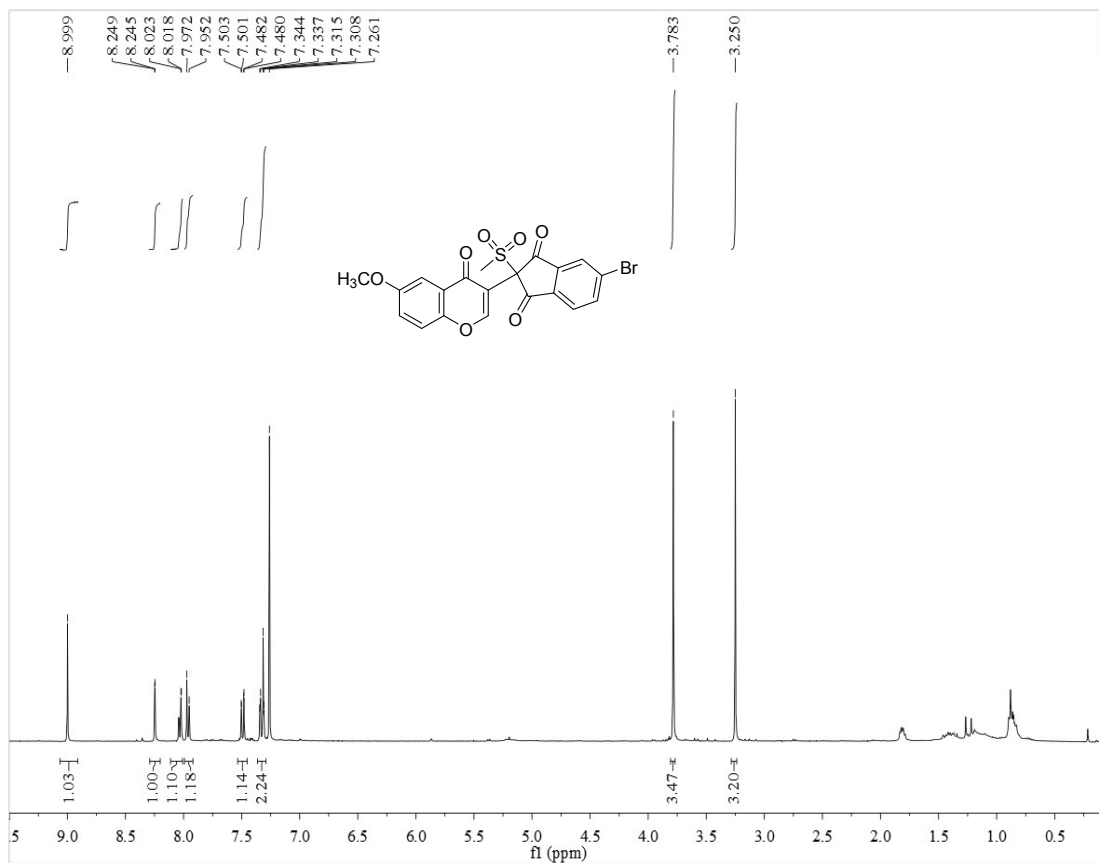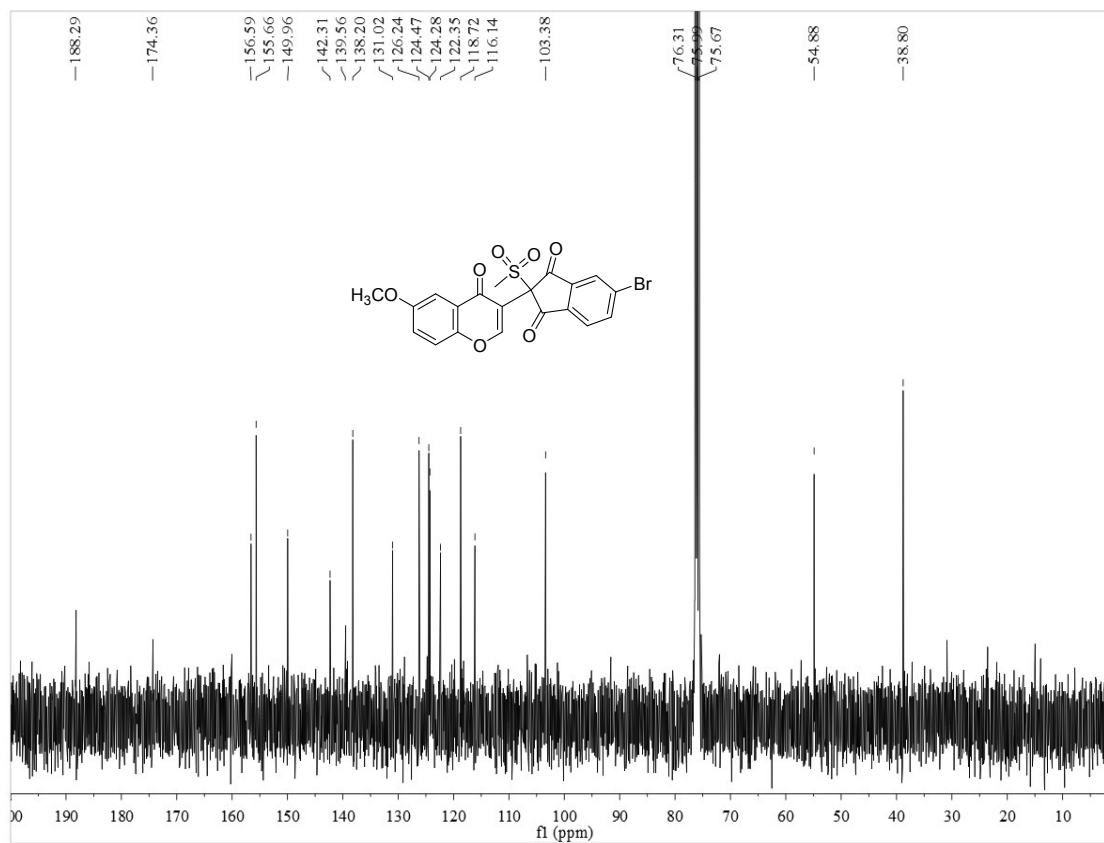



# <sup>1</sup>H and <sup>13</sup>C NMR of 3u

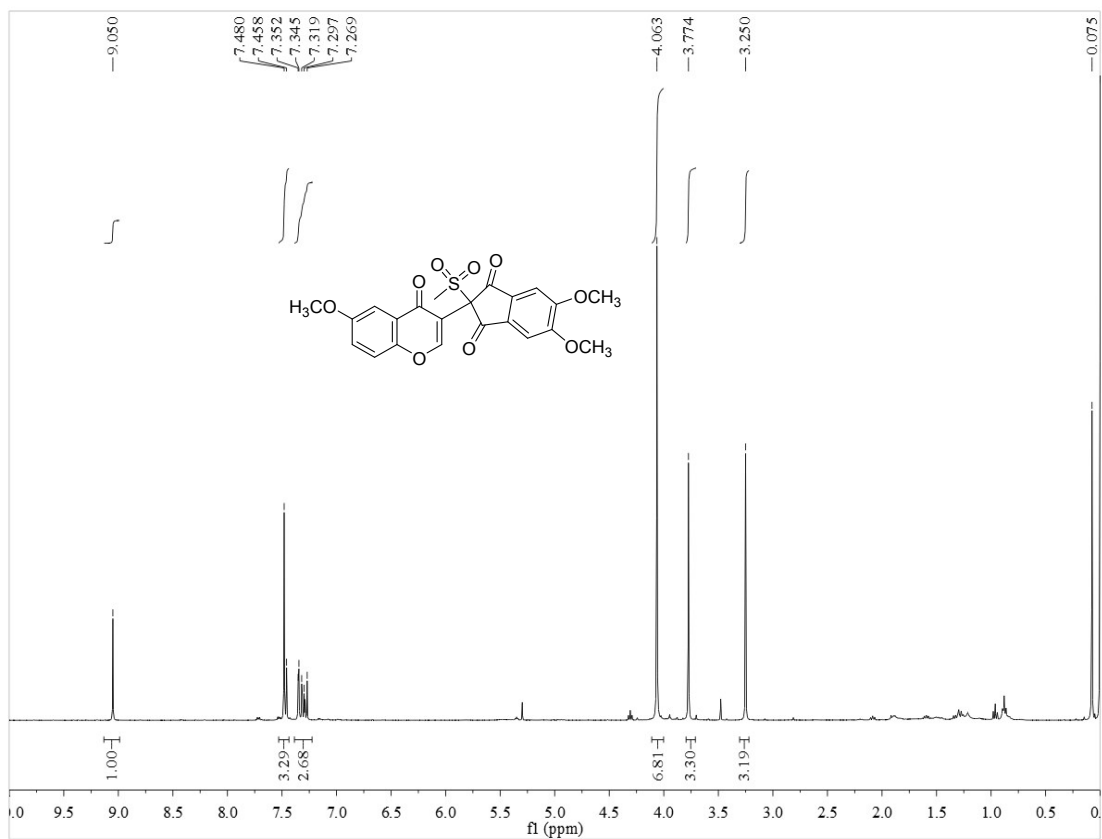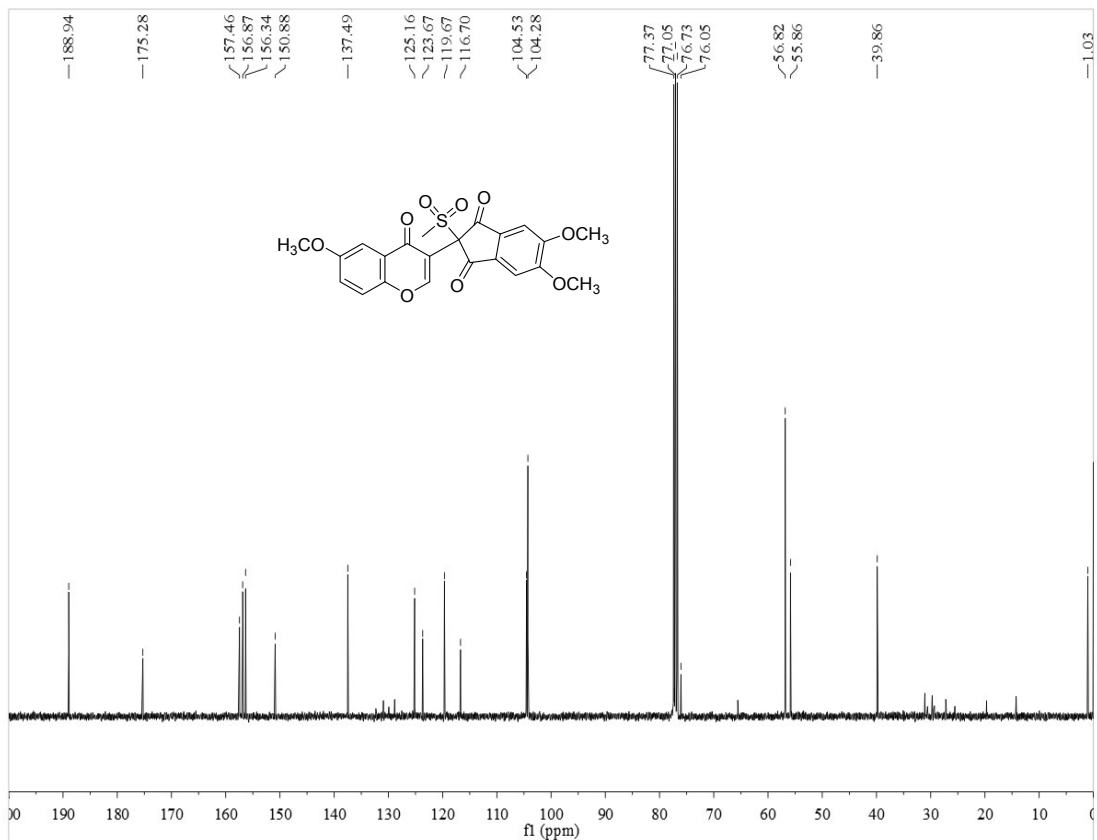

Supplement: d1ob00071c1.pdf [file d1ob00071c1.pdf]
